# Supplementary material for: Is interpregnancy interval associated with cardiovascular risk factors in later life? A cohort study
Source: PubMed Central journal article supplement (PMC3963084; doi:10.1136/bmjopen-2013-004173), 2014-03-19
Supplement: bmjopen-2013-004173.draft_revisions.pdf [file bmjopen-2013-004173.draft_revisions.pdf]

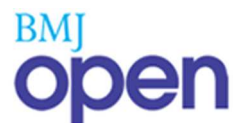

**Is inter-pregnancy interval associated with cardiovascular risk factors in later life? : a cohort study**

|                                 |                                                                                                                                                                                                                                                                                                            |
|---------------------------------|------------------------------------------------------------------------------------------------------------------------------------------------------------------------------------------------------------------------------------------------------------------------------------------------------------|
| Journal:                        | <i>BMJ Open</i>                                                                                                                                                                                                                                                                                            |
| Manuscript ID:                  | bmjopen-2013-004173                                                                                                                                                                                                                                                                                        |
| Article Type:                   | Research                                                                                                                                                                                                                                                                                                   |
| Date Submitted by the Author:   | 04-Oct-2013                                                                                                                                                                                                                                                                                                |
| Complete List of Authors:       | Knipe, Duleeka; University of Bristol, School of Social and Community Medicine<br>Fraser, Abigail; University of Bristol, School of Social and Community Medicine<br>Lawlor, Debbie; University of Bristol, School of Social and Community Medicine<br>Howe, Laura; University of Bristol, Social Medicine |
| <b>Primary Subject Heading</b>: | Epidemiology                                                                                                                                                                                                                                                                                               |
| Secondary Subject Heading:      | Public health                                                                                                                                                                                                                                                                                              |
| Keywords:                       | ALSPAC, Inter-pregnancy interval, Cardiovascular disease , Later-life, Women, Pregnancy                                                                                                                                                                                                                    |
|                                 |                                                                                                                                                                                                                                                                                                            |

SCHOLARONE™  
Manuscripts

Peer review only

**Is inter-pregnancy interval associated with cardiovascular risk factors in later life? : a cohort study**

1  
2  
3  
4 Duleeka W Knipe, PhD student<sup>1\*</sup>, Abigail Fraser, research fellow<sup>1,2</sup>, Debbie A Lawlor, professor of epidemiology<sup>1,2</sup>,  
5  
6 Laura D Howe, research fellow<sup>1,2</sup>  
7  
8  
9

10 <sup>1</sup>School of Social and Community Medicine, University of Bristol, Bristol, United Kingdom  
11

12 <sup>2</sup>MRC Integrative Epidemiology Unit at the University of Bristol, United Kingdom  
13  
14  
15  
16  
17

18 This work was carried out at the School of Social and Community Medicine, University of Bristol  
19  
20  
21

22 \*Corresponding author  
23

24 School of Social and Community Medicine  
25  
26

27 University of Bristol  
28  
29

30 Canynge Hall  
31

32 39 Whatley Road  
33

34 Bristol  
35

36 BS8 2PS  
37

38 Tel. 0117 928 7302  
39

40 Fax. 0117 928 7325  
41

42 dee.knipe@bristol.ac.uk  
43  
44  
45  
46  
47  
48  
49  
50  
51  
52  
53  
54  
55  
56  
57  
58  
59  
60

**Keywords**

ALSPAC

Inter-pregnancy interval

Cardiovascular disease

Later-life

Women

Pregnancy

**Word count** (excluding title page, abstract, references, figures and tables) : 3147

For peer review only

**ABSTRACT**

**Objectives:** Pregnancy represents a metabolic challenge to women; in a normal pregnancy, transient metabolic changes occur that support the needs of the growing fetus. It is possible that repeating this challenge within a relatively short amount of time may result in lasting damage to the woman's cardiovascular health. Conversely, it is also possible that long inter-pregnancy intervals may reflect subfertility, which has been found to be associated with cardiovascular disease (CVD). We examine the associations of short and long inter-pregnancy interval with measures of cardiovascular health

**Design:** Prospective Cohort

**Setting:** Mothers of the Avon Longitudinal Study of Parents and Children (ALSPAC)

**Participants:** Women with two live births in order to control for confounding by parity

**Outcome Measures:** Arterial distensibility, common carotid intima, adiposity, blood pressure, lipids, glucose, insulin, pro-insulin, triglycerides, C-reactive protein

**Results:** A total of 1268 mothers from the (ALSPAC), who had cardiovascular disease risk factors measured at mean age 48 years. After adjusting for confounding, we found no association of either short ( $\leq 15$  months) or long ( $> 27$  months) inter-pregnancy interval and increased levels of cardiovascular risk factors. There was some suggestion that women with both long and short inter-pregnancy interval had a more favourable lipid profile compared with women whose inter-pregnancy interval was 16-27 months, however the differences were small in magnitude and imprecisely estimated.

**Conclusion:** This study does not support the hypothesis that either long or short inter-pregnancy interval is a risk factor for later cardiovascular health.

## ARTICLE SUMMARY

**Article focus:** To examine the associations of short and long inter-pregnancy interval with measures of cardiovascular health

**Key Message:** This study does not support the hypothesis that either long or short inter-pregnancy interval is a risk factor for later cardiovascular health

### Strengths and limitations of this study

#### Strengths

- Its prospective design with detailed data on reproductive history
- The availability of a wide range of objectively-measured CVD risk factors and the large sample size.
- First study to examine the association of inter-pregnancy interval with cardiovascular risk factors.

#### Limitations

- As with other prospective cohort studies there was loss to follow-up, with those attending and completing all questionnaires tending to come from a higher socioeconomic background.
- Our analyses was restricted to women who had two live births to remove confounding by parity, and means that our findings may not generalise to women who had three or more children. We did not find any evidence of any strong differences between women who had either only one birth or three or more births, with women with two live/still births
- Inter-pregnancy interval was calculated by subtracting the average gestation period from the birth interval. We do not believe that this would have biased our findings as we used inter-pregnancy interval as a categorical variable and therefore any fluctuations around the average 9 month gestation would not have altered the findings substantially.
- Only generalizable to a largely white European population.
- The population being studied are still young (mean age at clinic =48), it is possible that the association may emerge at older ages, when inter-individual variability in cardiovascular risk factors becomes greater.

## INTRODUCTION

Pregnancy represents a metabolic challenge to women; in a normal pregnancy, transient metabolic changes occur that support the needs of the growing foetus. Women become relatively insulin resistant, hyperlipidemic and experience up-regulation of coagulation factors and the inflammatory cascade.[1] A recent systematic review and meta-analysis found that a short inter-pregnancy interval (<12 months) was associated with an increased risk of stillbirths, early neonatal death, preterm birth and low birth weight.[2] Associations between inter-pregnancy interval and cardiovascular outcomes, however, are not known. Given the cardiovascular changes during pregnancy, it is possible that if this challenge is repeated within a relatively short amount of time the effects on a women's metabolic system may be exacerbated and/or be longer lasting. This may have a deleterious effect on her long term cardiovascular health.

Conversely, it is also possible that a long inter-pregnancy interval is associated with increased cardiovascular risk. Longer inter-pregnancy intervals may reflect subfertility, which has been found to be associated with cardiovascular disease (CVD).[3, 4]

Here we examine the associations of short and long inter-pregnancy interval with measures of cardiovascular health (arterial distensibility, common carotid intima, adiposity, blood pressure, lipids, glucose, insulin, pro-insulin, triglycerides, C-reactive protein (CRP)) assessed at a mean age of 48years.

## METHODS

1  
2 The Avon Longitudinal Study of Parents and Children (ALSPAC) is a prospective population based birth  
3 cohort that recruited 14, 541 pregnant women resident in Avon, UK, who had expected delivery dates between 1<sup>st</sup>  
4 April 1991 and 31<sup>st</sup> December 1992. ALSPAC has previously been described in detail[5], and the study website  
5  
6 contains details of all the available data through a fully searchable data dictionary  
7  
8  
9  
10 (<http://www.bris.ac.uk/alspac/researchers/data-access/data-dictionary>). Ethical approval for the study was obtained  
11 from the ALSPAC Ethics and Law Committee and the Local Research Ethics Committees.  
12  
13

### Pregnancy data and inter-pregnancy interval

14  
15  
16  
17  
18 In order to remove confounding by parity, which is known to be associated with CVD,[6-12] we restrict our  
19 analyses to women with two pregnancies resulting in live births (self-reported). Women were eligible for inclusion in  
20 this study if they had two pregnancies that resulted in live births and completed all the questionnaires necessary to  
21 ascertain full reproductive history. The study flow diagram is presented in figure 1.  
22  
23  
24  
25

26  
27 Upon recruitment into the cohort (approximately 18 weeks gestation), women were asked to complete a  
28 questionnaire about their health prior to the current pregnancy, including the number of previous pregnancies; the  
29 number of miscarriages/abortions; the outcome (live birth, still birth, miscarriage, abortion or termination, live born  
30 baby that died, live born baby still alive and other) and end date (i.e. delivery or other outcome) of their most recent  
31 previous pregnancy. We used these data, along with subsequent questionnaires (n=5) throughout the 18 year period  
32 leading to our outcome assessment to identify women who had two pregnancies that resulted in a live birth. We only  
33 included pregnancies that resulted in a live birth and the two pregnancies that we used for the interval could have  
34 included those occurring before or after the pregnancy at which women were recruited.  
35  
36  
37  
38  
39  
40  
41  
42  
43  
44

### Assessment of cardiovascular risk factors

45  
46  
47 Between 2009 and 2011 eligible participants (N=11, 264 women) were invited to a research clinic assessment  
48 at which a range of cardiovascular outcomes were assessed; this clinic took place between 1.6 and 20.3 years (median  
49 18) since the second birth of the pregnancy interval exposure.  
50  
51  
52

53 Carotid intima media thickness (cIMT) for both the left and right common carotid artery scans were obtained  
54 via high-resolution B ultrasound and imaged longitudinally 1 cm proximal to the carotid bifurcation following a  
55 standardized protocol using a ZONARE z.one Ultra convertible ultrasound system with L10-5 linear transducer.  
56  
57  
58  
59  
60

1 Images were focused on the posterior (far) wall of the artery and the zoom function was used to magnify the area.  
2 Ten-second cine loops were recorded in DICOM format and analysed offline using Carotid Analyser for Research  
3 (Vascular Research Tools 5, Medical Imaging Applications, LLC 2008). Three consecutive cardiac cycles were  
4 identified and three measures of cIMT were taken from end-diastolic frames and averaged. This was done for both  
5 right and left carotid arteries. Arterial distensibility was calculated as the difference between systolic and diastolic  
6 arterial diameter. The mean of the left- and right-sided readings was used in analyses. The images were analysed by a  
7 single trained reader. Blood pressure was measured while the women were lying down with the use of an Omron M6  
8 monitor (Omron Healthcare UK Ltd, Milton Keynes, UK). Two readings of systolic and diastolic blood pressure were  
9 recorded on each arm, and the mean of these 4 readings was used here. Heart rate was measured in both a seated and  
10 standing position.  
11

12 Blood samples were taken after an overnight fast for those attending in the morning or after a minimum 6 hours  
13 fast for those attending the clinic after 14.00. Blood samples were obtained, centrifuged, separated, and frozen at  
14  $-80^{\circ}\text{C}$  within 30 minutes. Plasma glucose was measured by automated enzymatic (hexokinase) method. Plasma  
15 insulin was measured by an enzyme-linked immunosorbent assay (Mercodia, Uppsala, Sweden) that does not cross-  
16 react with proinsulin or c-peptide, and proinsulin was also measured by an enzyme-linked immunosorbent assay  
17 (Mercodia) that is a solid-phase 2-site enzyme immunoassay for the quantification of human proinsulin. Lipids were  
18 measured by automated analyser with enzymatic methods. CRP was measured by automated particle-enhanced  
19 immunoturbidimetric assay (Roche UK, Welwyn Garden City, UK).  
20

21 Whole body fat mass was measured using dual-energy x-ray absorptiometry (DXA) whole body scans.  
22 Weight and height were measured with the subjects in light clothing and without shoes. Weight was measured to the  
23 nearest 0.1 kg with the use of Tanita scales. Height was measured to the nearest 0.1 cm with a Harpenden stadiometer.  
24 Waist circumference was measured twice to the nearest 1 mm at the midpoint between the lower ribs and the pelvic  
25 bone with a flexible tape. The mean of the 2 measures is used here.  
26

27 A total of 5,005 women attended clinic (44% response). Women attending clinic had a mean age of 48 years  
28 Women pregnant at the time of clinic assessment were excluded from our analyses (n=7).  
29

### 30 **Measurement of Confounding factors**

31 Information on pre-pregnancy weight and height, smoking in pregnancy, single parent households, ethnicity,  
32 education, and social class were obtained from questionnaires completed at the time of recruitment during the index  
33  
34



1 pregnancy. Ethnicity was categorised as white or non-white. Education was categorized as below or above university  
2 education. Household occupational social class was defined according to the 1991 British Office of Population and  
3 Census Statistics classification (classes I [professional/managerial] to V [unskilled manual workers]) using either the  
4 woman's occupation or her partners, whichever was highest. Smoking in pregnancy was categorized as ever or never  
5 smoked during pregnancy, at approximately 18-20 weeks gestation. Ideally, we would wish to measure these potential  
6 confounders in relation to the first pregnancy of the interval and for some to have time updated (i.e. also information  
7 from the second pregnancy) measurements. In this study, however, we only have data on the pregnancy when women  
8 were recruited and this is the first pregnancy of the interval for 30.9% of the women and the second for the remaining  
9 69%.

### 20 **Statistical Analysis**

21 Distributions of insulin, pro-insulin, triglyceride, CRP, glucose and low-density lipo-protein were right  
22 skewed, and so were log transformed for all regression model analyses, which ensured the residuals were  
23 approximately normally distributed. We compared women with sufficient data for us to detail their full reproductive  
24 history with those women with insufficient data, in terms of all confounding variables. Similarly, we compared those  
25 women who formed our eligible sample (only 2 live births and not pregnant at the time of outcome assessment) with  
26 women with either only 1 birth or  $\geq 3$  more births, in terms of all confounding and outcome variables. Chi-squared  
27 tests for categorical data and t-tests for continuous normally distributed variables were performed. Inter-pregnancy  
28 interval was calculated as the difference between the dates of delivery of the two pregnancies, minus the average  
29 gestation period (9 months). Inter-pregnancy interval was grouped into three categories:  $\leq 15$  months, 16-27 and  $> 27$   
30 months; these groups correspond to  $\leq 2$  years, 2-3 years and  $> 3$  years between births.

31 The association between our categorised measure of inter-pregnancy interval and each outcome was assessed  
32 using multiple linear regression, with and without adjustment for potential confounders, comparing both short and  
33 long inter-pregnancy interval with the reference category of 16-27 months. All analysis was conducted in Stata/MP  
34 12.0.

### 35 **Dealing with missing data**

36 Within our eligible study sample of 1268, there was some missing data on potential confounders and outcome  
37 measurements (data on exposure had to be observed to be eligible). The extent of missing data varied from 0-29%,  
38  
39  
40  
41  
42

1 with blood based measures having the most missing data (web table 5). In order to increase efficiency and minimise  
2 selection bias, we imputed missing variables for eligible participants who had missing data on outcomes or  
3 confounders, using multivariate multiple imputation. We included all the exposure, confounder and outcome measures  
4 in the imputation equations. We used switching regression in Stata and carried out 20 cycles of regression switching  
5 and generated 20 imputation datasets. The main analysis results are obtained by averaging across the results from each  
6 of these 20 datasets using Rubin's rules and the standard errors for any regression coefficients (used to calculate p-  
7 values and 95% confidence intervals) take account of uncertainty in the imputations as well as uncertainty in the  
8 estimate.[13] We carried out all our linear regression analysis using both the imputed and complete case datasets. Web  
9 table 1 shows that the distributions of variables in the imputed and non-imputed/complete-case datasets were similar.  
10  
11  
12  
13  
14  
15  
16  
17  
18  
19

## 20 RESULTS

### 21 Sample description

22 A total of 3451 women had sufficient data to describe a full reproductive history; of these 1970 were excluded  
23 because they had either just 1 (n=971) or  $\geq 3$  births (n=999). A further 4 were pregnant at the time of assessment and  
24 were excluded. Of the remaining 1477 women who had two live births, 147 were excluded as they were recruited into  
25 the cohort during their second pregnancy, with the most recent previous pregnancy resulting in a miscarriage,  
26 termination, still birth or "other" outcome. Inter-pregnancy interval could be calculated for 1268 of the remaining  
27 eligible women (95%). Of these women, 954 attended the clinic assessment in 2009-11 and 792 women had complete  
28 data for all outcome and confounder measures (figure 1). Thus, our complete case analysis was performed on 792  
29 women, and analysis using multivariate multiple imputation included 1268 women.  
30  
31  
32  
33  
34  
35  
36  
37  
38  
39

40 Women who had a provided sufficient data to describe their full reproductive history were on average slightly  
41 older, from a higher socioeconomic background, more likely to be smokers and white, and less likely to be in a single  
42 parent household, compared with women with insufficient data to describe their full reproductive history (table 1).  
43 Women eligible for this study (two live births) were more likely to be smokers compared to women with either 1 or  $\geq 3$   
44 births (web table 1). No clear differences with regard to the other confounding variables were observed. There were  
45 small differences observed in terms of cardiovascular risk factors (web table 1), with women with single and 3 or  
46 more pregnancies having slightly worse cardiovascular risk profile compared to women with 2 pregnancies.  
47  
48  
49  
50  
51  
52  
53  
54  
55  
56  
57  
58  
59  
60

TABLE 1 – Characteristics of women with full reproductive histories compared to those with incomplete reproductive histories as determined from five questionnaires

|                                   | Women with Incomplete Data<br>n=10262 | Women with Complete Data<br>n=3451 | P-value |
|-----------------------------------|---------------------------------------|------------------------------------|---------|
| Categorical Variables - n (%)     |                                       |                                    |         |
| Ethnicity                         | n=8653                                | n=3417                             |         |
| White                             | 8381 (96.9)                           | 3370 (98.6)                        | <0.001  |
| Social Class                      | n=7927                                | n=3335                             |         |
| i                                 | 842 (10.6)                            | 664 (19.9)                         |         |
| ii                                | 3099 (39.1)                           | 1601 (48.0)                        |         |
| iii (non-manual)                  | 2135 (26.9)                           | 738 (22.1)                         | <0.001  |
| iii (manual)                      | 1261 (15.9)                           | 258 (7.7)                          |         |
| iv & v                            | 590 (7.4)                             | 74 (2.2)                           |         |
| Education                         | n=8739                                | n=3425                             |         |
| University Level or above         | 826 (9.5)                             | 742 (21.7)                         | <0.001  |
| Single Parent Household           | n=9136                                | n=3403                             |         |
| Yes                               | 616 (6.7)                             | 102 (3.0)                          | <0.001  |
| Ever smoked                       | n=9365                                | n=3441                             |         |
| Yes                               | 5124 (54.7)                           | 1369 (39.8)                        | <0.001  |
| Continuous Variables - mean (SD*) |                                       |                                    |         |
| Age                               | n=10258<br>27.4 (5.0)                 | n=3451<br>29.8 (4.4)               | <0.001  |

\* T-test for normally distributed data

**Participant characteristics**

1  
2 The characteristics of women according to their inter-pregnancy interval are presented in table 2. There were  
3  
4 no noticeable differences between inter-pregnancy interval categories in terms of pre-pregnancy BMI, ethnicity, social  
5  
6 class, education, and smoking status. Women with a longer inter-pregnancy interval, however, were more likely to be  
7  
8 in single parent households and slightly younger compared to all other women (table 2). Table 3 presents the  
9  
10 distribution of the outcome variables for all those women who attended the follow-up assessment in 2009-11.  
11  
12  
13  
14  
15  
16  
17  
18  
19  
20  
21  
22  
23  
24  
25  
26  
27  
28  
29  
30  
31  
32  
33  
34  
35  
36  
37  
38  
39  
40  
41  
42  
43  
44  
45  
46  
47  
48  
49  
50  
51  
52  
53  
54  
55  
56  
57  
58  
59  
60

For peer review only

TABLE 2 – Characteristics of women by inter-pregnancy interval N=1268

|                                          |                                           | Inter-pregnancy interval of all included women |                     |                     |         |
|------------------------------------------|-------------------------------------------|------------------------------------------------|---------------------|---------------------|---------|
|                                          |                                           | n=1268                                         |                     |                     |         |
|                                          |                                           | ≤15 months                                     | 16-27 months        | >27 months          | p-value |
|                                          |                                           | n=269                                          | n=412               | n=582               |         |
| <b>Continuous Variables - mean (SD)*</b> |                                           |                                                |                     |                     |         |
|                                          | Age at birth of the ALSPAC index child    | n=269<br>30.4 (3.7)                            | n=412<br>30.2 (3.6) | n=582<br>29.3 (4.3) | <0.001  |
|                                          | Pre-Pregnancy BMI (kg/m <sup>2</sup> ) ** | n=256<br>22.6 (2.9)                            | n=391<br>22.5 (3.4) | n=534<br>22.7 (3.4) | 0.6     |
| <b>Categorical Variables - n (%)</b>     |                                           |                                                |                     |                     |         |
|                                          | Ethnicity                                 | n=267                                          | n=411               | n=577               | 0.4     |
|                                          | White                                     | 265 (99.3)                                     | 406 (98.8)          | 566 (98.1)          |         |
|                                          | Social Class                              | n=261                                          | n=409               | n=568               |         |
|                                          | I (highest; professional)                 | 59 (22.6)                                      | 89 (21.8)           | 109 (19.2)          |         |
|                                          | ii                                        | 127 (48.7)                                     | 198 (48.4)          | 274 (48.2)          |         |
|                                          | iii (non-manual)                          | 54 (20.7)                                      | 74 (18.1)           | 141 (24.8)          | 0.2     |
|                                          | iii (manual)                              | 17 (6.5)                                       | 37 (9.1)            | 34 (6.0)            |         |
|                                          | iv & v (lowest; unskilled manual)         | 4 (1.5)                                        | 11 (2.7)            | 10 (1.8)            |         |
|                                          | Education                                 | n=269                                          | n=411               | n=580               | 0.4     |
|                                          | University Level or above                 | 66 (24.5)                                      | 82 (20.0)           | 124 (21.4)          |         |
|                                          | Single Parent household                   | n=269                                          | n=412               | n=578               | <0.001  |
|                                          | Yes                                       | 1 (0.4)                                        | 3 (0.7)             | 24 (4.2)            |         |
|                                          | Smoked during pregnancy **                | n=268                                          | n=412               | n=581               | 1.0     |
|                                          | Yes                                       | 101 (38.0)                                     | 152 (37.0)          | 2013 (36.7)         |         |

\* SD - Standard Deviation

\*\* Relates to the first child in some women and second in others

TABLE 3 – Distribution of pre-pregnancy BMI and outcomes at research clinic assessment (2009-11) in the full cohort

| Outcome                                | n=   | Mean (SD)*     |
|----------------------------------------|------|----------------|
| Age at clinic (years)                  | 4492 | 47.9 (4.5)     |
| Pre-pregnancy BMI (kg/m <sup>2</sup> ) | 4223 | 22.6 (3.4)     |
| BMI (kg/m <sup>2</sup> )               | 4483 | 26.6 (5.3)     |
| Waist (cm)                             | 4483 | 84.6 (12.4)    |
| SBP (mm hg)                            | 4357 | 118.3 (12.9)   |
| DBP (mm hg)                            | 4357 | 71.8 (8.9)     |
| Heart rate                             | 4357 | 84 (11.6)      |
| Fat Mass (kg)                          | 4430 | 27.2 (10893.2) |
| Avg. Arterial Distensibility (mm)      | 4408 | 0.5 (0.1)      |
| Common Carotid Intima (mm)             | 4415 | 0.6 (0.1)      |
| Cholesterol (mmol/l)                   | 4252 | 4.9 (0.9)      |
| High-density Lipoprotein (mmol/l)      | 4252 | 1.5 (0.4)      |
| Non-HDL cholesterol (mmol/l)           | 4252 | 3.5 (0.9)      |
|                                        |      | Median (IQR)** |
| Insulin (mu/l) (log)                   | 4246 | 4.7 (3.3,7)    |
| Pro-Insulin (pu/l) (log)               | 4251 | 5.2 (3.7,7.9)  |
| Triglyceride (mmol/l) (log)            | 4252 | 0.9 (0.7,1.2)  |
| C-reactive protein (mg/l) (log)        | 4252 | 1 (0.5,2.4)    |
| Glucose (mmol/l) (log)                 | 4252 | 5.2 (4.9,5.5)  |

\* SD -Standard Deviation

\*\* IQR - Inter-quartile range

### Association between inter-pregnancy interval and CVD risk factors

1  
2 Crude associations of inter-pregnancy interval with outcomes are presented in table 4 and 5. We found no  
3  
4 evidence that women with either short or long inter-pregnancy interval had more adverse cardiovascular risk factors  
5  
6 compared with women with an inter-pregnancy interval between 16-27 months. There was some suggestion that  
7  
8 women with both long and short inter-pregnancy interval had a more favourable lipid profile compared with women  
9  
10 whose inter-pregnancy interval was 16-27 months, however the differences were small in magnitude and imprecisely  
11  
12 estimated, with the 95% confidence interval including the null value.

13  
14 Adjustment for potential confounders or for potential mediation by BMI at outcome assessment did not change results  
15  
16 (tables 4, 5 and web table 3). These findings are similar to the results when the analysis was restricted to complete  
17  
18 cases (web table 4 and 5).  
19  
20  
21  
22  
23  
24  
25  
26  
27  
28  
29  
30  
31  
32  
33  
34  
35  
36  
37  
38  
39  
40  
41  
42  
43  
44  
45  
46  
47  
48  
49  
50  
51  
52  
53  
54  
55  
56  
57  
58  
59  
60

TABLE 4 – Unadjusted and confounder adjusted analysis of the association between inter-pregnancy interval and blood based cardiovascular risk factors using multivariate multiply imputed data (N=1268)

|                        |          | Inter-pregnancy interval |         |              |                   |            |  |
|------------------------|----------|--------------------------|---------|--------------|-------------------|------------|--|
|                        |          | ≤15 months               |         | 16-27 months |                   | >27 months |  |
| IBI (months)           |          | β* (95% CI)              | P-value | Ref Group    | β* (95% CI)       | P-value    |  |
| Cholesterol (mmol/l)   | Model 1a | -0.1 (-0.2,0.1)          | 0.3     | 0            | -0.1 (-0.2,0.03)  | 0.1        |  |
|                        | Model 2b | -0.1 (-0.3,0.1)          | 0.2     | 0            | -0.05 (-0.2,0.1)  | 0.4        |  |
| HDL (mmol/l)           | Model 1a | 0.03 (-0.04,0.1)         | 0.4     | 0            | -0.01 (-0.1,0.05) | 0.8        |  |
|                        | Model 2b | 0.03 (-0.04,0.1)         | 0.4     | 0            | 0.01 (0,0.1)      | 0.6        |  |
|                        |          | % Change (95% CI)        | P-value | Ref Group    | % Change (95% CI) | P-value    |  |
| Insulin (mu/l)*        | Model 1a | 1 (0.9,1.1)              | 0.8     | 0            | 1.1 (1,1.2)       | 0.1        |  |
|                        | Model 2b | 1 (0.9,1.1)              | 0.9     | 0            | 1 (1,1.1)         | 0.4        |  |
| Pro-Insulin (pmol/l)*  | Model 1a | 1 (0.9,1.1)              | 0.7     | 0            | 1.1 (1,1.1)       | 0.1        |  |
|                        | Model 2b | 1 (0.9,1.1)              | 0.8     | 0            | 1 (1,1.1)         | 0.2        |  |
| Triglyceride (mmol/l)* | Model 1a | 0.9 (0.9,1)              | 0.1     | 0            | 0.9 (0.9,1)       | 0.03       |  |
|                        | Model 2b | 0.9 (0.9,1)              | 0.1     | 0            | 0.9 (0.9,1)       | 0.02       |  |
| CRP (mg/l)*            | Model 1a | 0.9 (0.8,1.1)            | 0.4     | 0            | 1.1 (0.9,1.2)     | 0.4        |  |
|                        | Model 2b | 0.9 (0.8,1.1)            | 0.5     | 0            | 1 (0.9,1.2)       | 0.6        |  |
| Glucose (mmol/l)*      | Model 1a | 1 (1,1)                  | 0.7     | 0            | 1 (1,1)           | 0.4        |  |
|                        | Model 2b | 1 (1,1)                  | 0.6     | 0            | 1 (1,1)           | 0.3        |  |

\* Mean difference compared with 16-27 months

\*\* Log transformed

<sup>a</sup> Unadjusted model

<sup>b</sup> Adjusted for age, ethnicity, social class, education, pre-pregnancy BMI, ever smoking during pregnancy



TABLE 5 - Unadjusted and confounder adjusted analysis of the association between inter-pregnancy interval and non-blood based cardiovascular risk factors using multivariate multiply imputed data (N=1268)

|                          |                      | Inter-pregnancy interval |         |              |                      |         |
|--------------------------|----------------------|--------------------------|---------|--------------|----------------------|---------|
|                          |                      | ≤15 months               |         | 16-27 months | >27 months           |         |
|                          |                      | β* (95% CI)              | P-value | Ref          | β* (95% CI)          | P-value |
| Avg. Arterial            | Model 1 <sup>a</sup> | -0.0003 (-0.02,0.02)     | 1       | 0            | 0.02 (0.001,0.04)    | 0.04    |
| Distensibility (mm)      | Model 2 <sup>b</sup> | 0.002 (-0.02,0.02)       | 0.9     | 0            | 0.01 (-0.003,0.03)   | 0.1     |
| Common Carotid           | Model 1 <sup>a</sup> | 0 (-0.01,0.02)           | 0.4     | 0            | -0.0008 (-0.01,0.01) | 0.9     |
| Intima (mm)              | Model 2 <sup>b</sup> | 0.003 (-0.01,0.01)       | 0.6     | 0            | 0.002 (-0.01,0.01)   | 0.7     |
| Total body fat mass      | Model 1 <sup>a</sup> | -0.2 (-1.7,1.3)          | 0.8     | 0            | 0.4 (-0.8,1.7)       | 0.5     |
| (kg)                     | Model 2 <sup>b</sup> | -0.3 (-1.6,0.9)          | 0.6     | 0            | -0.05 (-1.1,1)       | 0.9     |
|                          | Model 1 <sup>a</sup> | 0 (-0.7,0.8)             | 0.9     | 0            | 0.3 (-0.3,0.9)       | 0.3     |
| BMI (kg/m <sup>2</sup> ) | Model 2 <sup>b</sup> | -0.02 (-0.6,0.5)         | 0.9     | 0            | 0 (-0.4,0.5)         | 0.8     |
|                          | Model 1 <sup>a</sup> | -0.1 (-1.8,1.6)          | 0.9     | 0            | 0.6 (-0.8,2.1)       | 0.4     |
| Waist (cm)               | Model 2 <sup>b</sup> | -0.3 (-1.7,1.1)          | 0.7     | 0            | 0.1 (-1.1,1.4)       | 0.8     |
|                          | Model 1 <sup>a</sup> | 0.1 (-1.9,2.2)           | 0.9     | 0            | -0.6 (-2.3,1.2)      | 0.5     |
| Systolic BP (mm hg)      | Model 2 <sup>b</sup> | 0.1 (-1.9,2.1)           | 0.9     | 0            | -0.5 (-2.3,1.2)      | 0.5     |
| Diastolic BP (mm         | Model 1 <sup>a</sup> | 0.1 (-1.3,1.4)           | 0.9     | 0            | -0.4 (-1.6,0.8)      | 0.5     |
| hg)                      | Model 2 <sup>b</sup> | 0.1 (-1.2,1.5)           | 0.9     | 0            | -0.5 (-1.7,0.7)      | 0.4     |
|                          | Model 1 <sup>a</sup> | 0.4 (-1.6,2.4)           | 0.7     | 0            | 0 (-1.7,1.6)         | 1       |
| Heart Rate               | Model 2 <sup>b</sup> | 0.3 (-1.7,2.4)           | 0.7     | 0            | 0 (-1.6,1.7)         | 1       |

\* Mean difference compared with 16-27 months

<sup>a</sup> Unadjusted model

<sup>b</sup> Adjusted for age, ethnicity, social class, education, pre-pregnancy BMI, ever smoking during pregnancy

## DISCUSSION

We found no association between short or long inter-pregnancy interval and levels of cardiovascular risk factors in a cohort of women with a mean age of 48 years. This is in contrast to our initial hypotheses that shorter inter-pregnancy intervals may give a woman's cardiovascular system insufficient time to recover, that longer inter-pregnancy intervals may reflect subfertility and that both may be associated with adverse levels of cardiovascular risk factors. We actually found weak evidence that women with both short ( $\leq 15$  months) and long inter-pregnancy intervals ( $> 27$ ) had a more favourable lipid profile (i.e. the opposite of our initial hypotheses) compared with women with an inter-pregnancy interval between 16 and 27 months, but the associations were not large, were imprecisely estimated, and were not consistent across all outcomes and may be due to chance.

To our knowledge, this is the first study to examine the relationship between pregnancy interval and subsequent cardiovascular outcomes. Several previous studies have examined the association of parity with cardiovascular outcomes, with most,[6-12] though not all,[14-16] finding that greater parity is related to more adverse risk factors and greater disease risk. A recent study investigated this association in a population of 1.3 million, using the Swedish registry data,[12] and found a J-shaped relationship between parity and CVD risk, with both nulliparous and grand multiparous ( $\geq 5$  births) having elevated risk compared to those women with 2 births. One possible mechanism for this association is that multiparous women are more likely to have births closer together, and the repeating of the cardiovascular challenge within a relatively short amount of time may lead to the effects on a women's metabolic system to be exacerbated and/or be longer lasting. Our findings do not support this hypothesis. Our results therefore suggest that the association of parity with greater CVD risk may be through another mechanism. Possible theories for the mechanisms underlying the greater risk of CVD after 2 children are: 1) other adverse lifestyle factors being adopted as a family size increases; 2) socio-demographic and other characteristics associated with increased risk of CVD also being associated with having more children; 3) adverse metabolic disturbances accumulating over pregnancies.[12]

The strengths of this study include the prospective design; detailed data on reproductive history; the availability of a wide range of objectively-measured CVD risk factors; and the large sample size. We were able to adjust for a range of potential confounding factors, and we restricted our analyses to women who had two live births in order to remove confounding by parity. To the best of our knowledge, we are the first study to examine the association of inter-pregnancy interval with cardiovascular risk factors. The findings of this study however should be considered

1  
2  
3  
4  
5  
6  
7  
8  
9  
10  
11  
12  
13  
14  
15  
16  
17  
18  
19  
20  
21  
22  
23  
24  
25  
26  
27  
28  
29  
30  
31  
32  
33  
34  
35  
36  
37  
38  
39  
40  
41  
42

in light of several limitations. As with other prospective cohort studies there was loss to follow-up, with those attending and completing all questionnaires tending to come from a higher socioeconomic background. Missing data would bias our results if the association between inter-pregnancy interval and cardiovascular risk factors differed in those included in our analyses and those excluded due to missing data. We are unable to test this assumption, but have no reason to suspect that it may be violated. One important consideration when interpreting our results is that we have restricted our analyses to women who had two live births. Whilst we feel that this was a sensible analysis strategy in order to remove confounding by parity, it means that our findings may not generalise to women who had three or more children. We did not find any evidence of any strong differences between women who had either only one birth or three or more births, with women with two live/still births (web table 1). Inter-pregnancy interval was calculated by subtracting the average gestation period (9 months) from the birth interval, ideally we would have liked to have calculated exact gestation periods for each live birth. We do not, however, believe that this would have biased our findings as we used inter-pregnancy interval as a categorical variable and therefore any fluctuations around the average 9 month gestation would not have altered the findings substantially. A further limitation of this study is these findings are only generalizable to a largely white European population. As the population being studied are still young (mean age at clinic =48), it is possible that the association may emerge at older ages, when inter-individual variability in cardiovascular risk factors becomes greater. Ideally we would have measured pre-pregnancy BMI and smoking during pregnancy for the first pregnancy of all women. Due to our study design, this was not possible. These measurements are from the first pregnancy in some women and the second pregnancy in others. There is therefore the possibility that these measurements are not a reasonable representation of levels in the first pregnancy for all women; this may lead to residual confounding. However given that the associations we observe are null, we do not think this has biased our results.

43  
44  
45  
46  
47  
48  
49  
50  
51  
52  
53  
54  
55  
56  
57  
58  
59  
60

In conclusion, our results do not support an association between inter-pregnancy interval and cardiovascular risk factors. Further studies in different settings such as low income countries where the social patterning of inter-pregnancy interval may differ and in older women with greater inter-individual variability in cardiovascular risk factors would provide a more comprehensive understanding of these associations.

## ACKNOWLEDGEMENTS

We are extremely grateful to all the families who took part in this study, the midwives for their help in recruiting them, and the whole ALSPAC team, which includes interviewers, computer and laboratory technicians, clerical workers, research scientists, volunteers, managers, receptionists and nurses. This publication is the work of the authors and DWK will serve as guarantor for the contents of this paper.

## COMPETING INTERESTS

None declared

## FUNDING

The work was supported by the British Heart Foundation [SP/07/008/24066], the UK Medical Research Council [0701594 to A.F and G1002375 to LH] and the Wellcome Trust (and WT099874MA to D.W.K ). AF, DAL and LDH work in a unit that receives funding from the UK Medical Research Council and the University of Bristol. The UK Medical Research Council ([074882], the Wellcome Trust [WT076467] and the University of Bristol provide core funding support for ALSPAC.

## AUTHOR CONTRIBUTIONS

DAL, LH and AF conceived the study idea; DWK, LH and AF developed the analysis plan; DWK undertook the analysis under the supervision of LH and AF; DWK wrote the first draft of the paper and collated co-author feedback; and all authors contributed to the critical review and final version.

## REFERENCES

- 1 N. Sattar, Do pregnancy complications and CVD share common antecedents? *Atheroscler Suppl* 2004;**5**:3-7
- 2 A. Wendt, C. M. Gibbs, S. Peters, et al., Impact of increasing inter-pregnancy interval on maternal and infant health. *Paediatric and perinatal epidemiology* 2012;**26 Suppl 1**:239-58
- 3 C. G. Solomon, F. B. Hu, A. Dunaif, et al., Menstrual cycle irregularity and risk for future cardiovascular disease. *The Journal of clinical endocrinology and metabolism* 2002;**87**:2013-7
- 4 N. I. Parikh, S. Cnattingius, M. A. Mittleman, et al., Subfertility and risk of later life maternal cardiovascular disease. *Human reproduction* 2012;**27**:568-75
- 5 A. Fraser, C. Macdonald-Wallis, K. Tilling, et al., Cohort Profile: The Avon Longitudinal Study of Parents and Children: ALSPAC mothers cohort. *Int J Epidemiol* 2012;**97**:110
- 6 F. Atsma, M. L. Bartelink, D. E. Grobbee, et al., Reproductive factors, metabolic factors, and coronary artery calcification in older women. *Menopause* 2008;**15**:899-904
- 7 J. M. Catov, A. B. Newman, K. Sutton-Tyrrell, et al., Parity and cardiovascular disease risk among older women: how do pregnancy complications mediate the association? *Ann Epidemiol* 2008;**18**:873-9
- 8 L. G. Gallagher, L. B. Davis, R. M. Ray, et al., Reproductive history and mortality from cardiovascular disease among women textile workers in Shanghai, China. *International Journal of Epidemiology* 2011;**40**:1510-1518
- 9 A. Green, V. Beral and K. Moser, Mortality in Women in Relation to Their Childbearing History. *Brit Med J* 1988;**297**:391-395
- 10 D. H. Jaffe, Z. Eisenbach and O. Manor, The effect of parity on cause-specific mortality among married men and women. *Matern Child Health J* 2011;**15**:376-85
- 11 R. B. Ness, T. Harris, J. Cobb, et al., Number of pregnancies and the subsequent risk of cardiovascular disease. *N Engl J Med* 1993;**328**:1528-33
- 12 N. I. Parikh, S. Cnattingius, P. W. Dickman, et al., Parity and risk of later-life maternal cardiovascular disease. *American heart journal* 2010;**159**:215-221 e6
- 13 P. Royston, Multiple imputation of missing values. *Stata J* 2004;**4**:227-241
- 14 H. S. Chang, N. Odongua, H. Ohrr, et al., Reproductive risk factors for cardiovascular disease mortality among postmenopausal women in Korea: the Kangwha Cohort Study, 1985-2005. *Menopause* 2011;**18**:1205-12
- 15 G. A. Colditz, W. C. Willett, M. J. Stampfer, et al., A prospective study of age at menarche, parity, age at first birth, and coronary heart disease in women. *Am J Epidemiol* 1987;**126**:861-70
- 16 K. Steenland, C. Lally and M. Thun, Parity and coronary heart disease among women in the American Cancer Society CPS II population. *Epidemiology* 1996;**7**:641-3

FIGURES LEGENDS

1  
2  
3  
4  
5  
6  
7  
8  
9  
10  
11  
12  
13  
14  
15  
16  
17  
18  
19  
20  
21  
22  
23  
24  
25  
26  
27  
28  
29  
30  
31  
32  
33  
34  
35  
36  
37  
38  
39  
40  
41  
42  
43  
44  
45  
46  
47  
48  
49  
50  
51  
52  
53  
54  
55  
56  
57  
58  
59  
60

Figure 1 – Flow-chart of selection of women for analysis

For peer review only

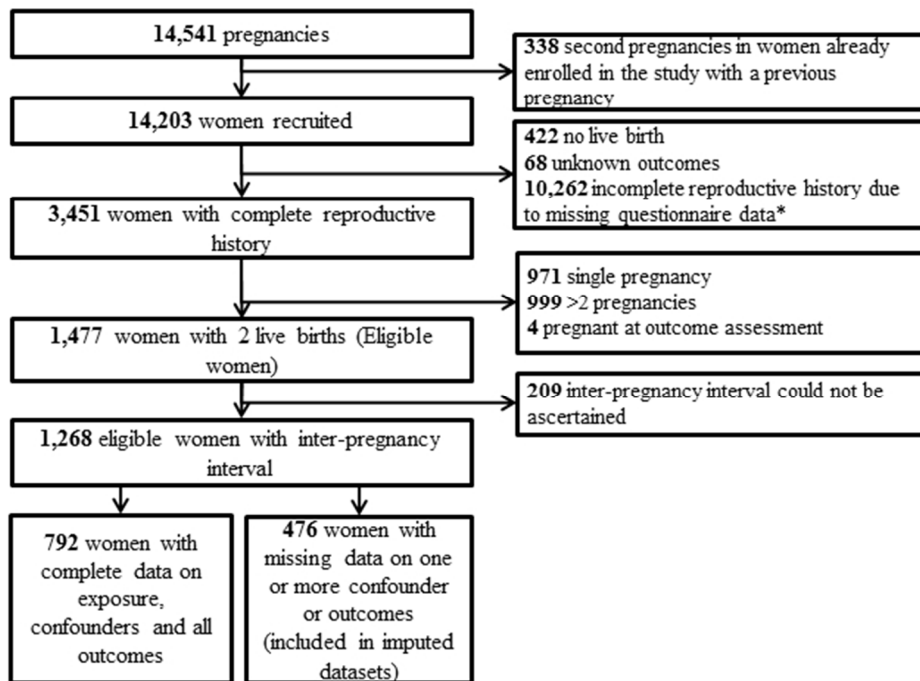

179x124mm (96 x 96 DPI)

view only

**Web table 1** – Distributions of imputed characteristics (% or mean (standard error)) in the imputation datasets and in the complete case sample (i.e. non-imputed)

| Imputed Variables                   | Missing          |                | Imputed Data | Non-imputed  |
|-------------------------------------|------------------|----------------|--------------|--------------|
|                                     | (n)              | % data imputed |              |              |
| <b>Exposure</b>                     |                  |                |              |              |
| Inter pregnancy interval            | 0                | 0%             | N/A          | 44.85 (0.84) |
| <b>Confounders</b>                  |                  |                |              |              |
| Pre-pregnancy BMI                   | 61               | 5%             | 22.6 (0.1)   | 22.6 (0.1)   |
| Height                              | 17               | 1%             | 164.7 (0.2)  | 164.7 (0.2)  |
| Single parent household             | 4                | 0.3%           | 2%           | 2%           |
| Education                           |                  |                |              |              |
|                                     | < O-Level        |                | 13%          | 13%          |
|                                     | O-Level          |                | 34%          | 34%          |
|                                     | A-Level          | 3              | 0.2%         | 32%          |
|                                     | > A-Level        |                | 22%          | 22%          |
| Social Class                        |                  |                |              |              |
|                                     | i                |                | 21%          | 21%          |
|                                     | ii               |                | 48%          | 48%          |
|                                     | iii (non-manual) | 25             | 2%           | 22%          |
|                                     | iii (manual)     |                | 7%           | 7%           |
|                                     | iv & v           |                | 2%           | 2%           |
| Ethnicity - White                   | 8                | 0.6%           | 99%          | 99%          |
| Ever Smoked                         | 2                | 0.2%           | 37%          | 37%          |
| Age                                 | 0                | 0%             | 27.9 (0.1)   | 27.9 (0.1)   |
| <b>Outcomes at follow-up clinic</b> |                  |                |              |              |
| Avg. Arterial Distensibility (mm)   | 323              | 26%            | 0.5 (0.004)  | 0.5 (0.004)  |
| Common Carotid Intima (mm)          | 323              | 26%            | 0.6 (0.002)  | 0.6 (0.002)  |
| Waist (cm)                          | 324              | 26%            | 83.1 (0.3)   | 82.9 (0.4)   |
| SBP (mm hg)                         | 343              | 27%            | 117.9 (0.4)  | 117.7 (0.4)  |
| Fat Mass (kg)                       | 327              | 26%            | 26.3 (293.9) | 26.1 (327.9) |
| BMI (kg/m <sup>2</sup> )            | 324              | 26%            | 26.1 (0.1)   | 25.9 (0.2)   |
| DBP (mm hg)                         | 343              | 27%            | 71.7 (0.3)   | 71.5 (0.3)   |
| Heart rate                          | 343              | 27%            | 83.7 (0.4)   | 83.8 (0.4)   |
| Cholesterol (mmol/l)                | 365              | 29%            | 4.9 (0.03)   | 4.9 (0.03)   |
| HDL (mmol/l)                        | 365              | 29%            | 1.5 (0.01)   | 1.5 (0.01)   |
| LDL (mmol/l)                        | 365              | 29%            | 3 (0.03)     | 3 (0.03)     |
| Non-HDL cholesterol (mmol/l)        | 365              | 29%            | 3.4 (0.03)   | 3.4 (0.03)   |
| Insulin (mu/l) (log)                | 370              | 29%            | 1.5 (0.02)   | 1.5 (0.02)   |
| Pro-Insulin (pu/l) (log)            | 367              | 29%            | 1.7 (0.02)   | 1.7 (0.02)   |
| Triglyceride (mmol/l) (log)         | 365              | 29%            | -0.1 (0.01)  | -0.1 (0.01)  |
| CRP(mg/l) (log)                     | 365              | 29%            | 0.1 (0.04)   | 0 (0.04)     |
| Glucose (mmol/l) (log)              | 365              | 29%            | 1.6 (0.004)  | 1.6 (0.004)  |



**Web table 2** – Characteristics of eligible women (with two live births) compared to women with one or three or more live/still births, with full reproductive history n=3447

|                                             | No. of births   |                   |                           | P-value           |        |                   |            |            |        |
|---------------------------------------------|-----------------|-------------------|---------------------------|-------------------|--------|-------------------|------------|------------|--------|
|                                             | 1 birth (n=972) | 2 births (n=1479) | 3 or more births (n=1000) |                   |        |                   |            |            |        |
| <b>Confounder Variables</b>                 |                 |                   |                           |                   |        |                   |            |            |        |
| Ethnicity - White n (%)                     | n=961           | 948 (98.7)        | n=1469                    | 1449 (98.6)       | n=987  | 973 (98.6)        | 1.0        |            |        |
| Social Class n (%)                          |                 | i                 |                           | 177 (18.9)        |        | 297 (20.5)        | 190 (20.0) |            |        |
|                                             |                 | ii                |                           | 471 (50.2)        |        | 693 (47.9)        | 437 (46.1) |            |        |
|                                             |                 | iii (non-manual)  | n=938                     | 224 (23.9)        | n=1448 | 326 (22.5)        | n=949      | 188 (19.8) | <0.001 |
|                                             |                 | iii (manual)      |                           | 54 (5.8)          |        | 100 (6.9)         |            | 104 (12.0) |        |
|                                             |                 | iv & v            |                           | 12 (1.3)          |        | 32 (2.2)          |            | 30 (3.2)   |        |
| Education (University Level or above) n (%) | n=962           | 212 (22.0)        | n=1475                    | 313 (21.2)        | n=988  | 217 (22.0)        | 0.9        |            |        |
| Single Parent Household n (%)               | n=946           | 30 (3.2)          | n=1474                    | 35 (2.4)          | n=983  | 37 (3.8)          | 0.1        |            |        |
| Ever smoked n (%)                           | n=969           | 380 (39.2)        | n=1476                    | 557 (37.7)        | n=996  | 432 (43.4)        | 0.02       |            |        |
| Age mean (SD)*                              | n=972           | 29.3 (4.3)        | n=1479                    | 29.9 (4.1)        | n=1000 | 30.0 (4.8)        | 0.0004     |            |        |
| Pre-Preg BMI (kg/m2)* - median (IQR)        | n=923           | 21.9 (20.4,24.1)  | n=1403                    | 22.1 (20.4,24.1)  | n=931  | 22.1 (20.5,24.1)  | 0.81       |            |        |
| <b>Outcome Variables - median (IQR)</b>     |                 |                   |                           |                   |        |                   |            |            |        |
| BMI (kg/m2)*                                | n=730           | 25.2 (22.6,28.5)  | n=1095                    | 25 (22.6,29.3)    | n=705  | 25.9 (22.9,29.3)  | 0.003      |            |        |
| Waist (cm)*                                 | n=730           | 81.3 (74.7,89.3)  | n=1095                    | 81 (74.8,92.3)    | n=705  | 83.1 (75.7,92.3)  | 0.0003     |            |        |
| SBP (mm hg)*                                | n=714           | 116.8 (109.8,126) | n=1071                    | 115.3 (109,125.5) | n=691  | 117 (110.3,125.5) | 0.2        |            |        |
| DBP (mm hg)*                                | n=714           | 71 (66,76.8)      | n=1071                    | 70.3 (65.5,76.3)  | n=691  | 71.3 (66.3,76.3)  | 1.0        |            |        |
| Pulse*                                      | n=714           | 82.5 (76,89.5)    | n=1071                    | 83 (76.8,91.5)    | n=691  | 83.8 (77,91.5)    | 0.01       |            |        |
| Fat Mass (kg)*                              | n=724           | 25.3 (19.1,32)    | n=1091                    | 24.2 (18.9,34.2)  | n=704  | 25.9 (18.9,34.2)  | 0.01       |            |        |
| Avg. Arterial Distensibility (mm)*          | n=716           | 0.5 (0.4,0.6)     | n=1069                    | 0.5 (0.4,0.6)     | n=691  | 0.5 (0.4,0.6)     | 0.5        |            |        |
| Common Carotid Intima (mm)*                 | n=719           | 0.6 (0.5,0.6)     | n=1069                    | 0.6 (0.5,0.6)     | n=691  | 0.6 (0.5,0.6)     | 1.0        |            |        |
| Cholesterol (mmol/l)*                       | n=692           | 4.8 (4.3,5.4)     | n=1043                    | 4.9 (4.3,5.5)     | n=676  | 4.9 (4.4,5.5)     | 0.2        |            |        |
| High-density Lipoprotein (mmol/l)*          | n=692           | 1.5 (1.2,1.7)     | n=1043                    | 1.5 (1.2,1.7)     | n=676  | 1.4 (1.2,1.7)     | 0.1        |            |        |
| Non-HDL cholesterol (mmol/l)*               | n=692           | 3.3 (2.7,4)       | n=1043                    | 3.4 (2.8,4)       | n=676  | 3.5 (2.9,4)       | 0.1        |            |        |
| Very-low density lipoprotein (mmol/l)*      | n=692           | 0.4 (0.3,0.5)     | n=1043                    | 0.4 (0.3,0.6)     | n=676  | 0.4 (0.3,0.6)     | 0.03       |            |        |
| Insulin (mu/l)**                            | n=692           | 4.7 (3.3,6.3)     | n=1038                    | 4.5 (3.2,6.8)     | n=674  | 4.7 (3.2,6.8)     | 0.2        |            |        |
| Pro-insulin (pu/l)**                        | n=692           | 5 (3.7,7.2)       | n=1041                    | 5 (3.6,8)         | n=675  | 5.3 (3.7,8)       | 0.2        |            |        |
| Triglyceride (mmol/l)**                     | n=692           | 0.9 (0.7,1.2)     | n=1043                    | 0.9 (0.7,1.2)     | n=676  | 0.9 (0.7,1.2)     | 0.1        |            |        |
| CRP (mg/l)**                                | n=692           | 0.9 (0.5,2)       | n=1043                    | 0.9 (0.4,2.2)     | n=676  | 1 (0.5,2.2)       | 0.5        |            |        |
| Glucose (mmol/l)**                          | n=692           | 5.2 (4.9,5.5)     | n=1043                    | 5.1 (4.9,5.5)     | n=676  | 5.2 (4.9,5.5)     | 0.3        |            |        |

\* linear regression for p-value

\*\* log transformed for linear regression

**Web table 3** - Confounder and mediator adjusted analysis of the association between inter-pregnancy interval and cardiovascular risk factors using multivariate multiply imputed data (N=1268)

|                                   | Inter-pregnancy interval <sup>a</sup> |              |           |                    |       |
|-----------------------------------|---------------------------------------|--------------|-----------|--------------------|-------|
|                                   | ≤15 months                            | 16-27 months |           | >27 months         | P-    |
|                                   | β* (95% CI)                           | P-value      | Ref Group | β* (95% CI)        | value |
| Avg. Arterial Distensibility (mm) | -0.001 (-0.02,0.02)                   | 0.9          | 0         | 0.01 (-0.004,0.03) | 0.1   |
| Common Carotid Intima (mm)        | 0.004 (-0.01,0.02)                    | 0.5          | 0         | 0.002 (-0.01,0.01) | 0.7   |
| Waist (cm)                        | -0.1 (-1,0.7)                         | 0.8          | 0         | 0.1 (-0.7,0.9)     | 0.8   |
| Systolic BP (mm hg)               | 0.3 (-1.8,2.3)                        | 0.8          | 0         | -0.4 (-2.2,1.3)    | 0.6   |
| Diastolic BP (mm hg)              | 0.2 (-1.1,1.6)                        | 0.8          | 0         | -0.5 (-1.6,0.6)    | 0.4   |
| Heart Rate                        | 0.4 (-1.5,2.3)                        | 0.7          | 0         | -0.1 (-1.8,1.7)    | 1.0   |
| Cholesterol (mmol/l)              | -0.1 (-0.3,0.04)                      | 0.1          | 0         | -0.1 (-0.2,0.1)    | 0.4   |
| HDL (mmol/l)                      | 0.02 (-0.05,0.1)                      | 0.6          | 0         | 0.02 (-0.04,0.1)   | 0.6   |
|                                   |                                       | P-           |           |                    | P-    |
|                                   | % Change (95% CI)                     | value        | Ref Group | % Change (95% CI)  | value |
| Insulin (mu/l)**                  | 1 (0.9,1.1)                           | 1.0          | 0         | 1 (0.9,1.1)        | 0.6   |
| Pro-Insulin (pmol/l)**            | 1 (1,1.1)                             | 0.4          | 0         | 1.1 (1,1.1)        | 0.2   |
| Triglyceride (mmol/l)**           | 0.9 (0.9,1)                           | 0.1          | 0         | 0.9 (0.9,1)        | 0.02  |
| CRP (mg/l)**                      | 0.9 (0.8,1.1)                         | 0.6          | 0         | 1 (0.9,1.2)        | 0.7   |
| Glucose (mmol/l)**                | 1 (1,1)                               | 0.6          | 0         | 1 (1,1)            | 0.3   |

\* Mean difference compared with 16-27 months

\*\* Log transformed

<sup>a</sup> Adjusted for age, ethnicity, social class, education, pre-pregnancy BMI, ever smoking during pregnancy and BMI at follow-up clinic

**Web table 4** – Unadjusted, confounder and mediator adjusted analysis of the association between inter-birth interval and blood based cardiovascular risk factors using complete case data (N=792)

|                         |                      | Inter-pregnancy interval |         |              |                   |         |
|-------------------------|----------------------|--------------------------|---------|--------------|-------------------|---------|
|                         |                      | ≤15 months               |         | 16-27 months | >27 months        |         |
|                         |                      | β* (95% CI)              | P-value | Ref Group    | β* (95% CI)       | P-value |
| Cholesterol (mmol/l)    | Model 1 <sup>a</sup> | -0.1 (-0.3,0.04)         | 0.1     | 0            | -0.1 (-0.3,-0.01) | 0.04    |
|                         | Model 2 <sup>b</sup> | -0.2 (-0.3,0.01)         | 0.06    | 0            | -0.1 (-0.2,0.06)  | 0.3     |
|                         | Model 3 <sup>c</sup> | -0.2 (-0.3,0)            | 0.05    | 0            | -0.1 (-0.2,0.06)  | 0.3     |
| HDL (mmol/l)            | Model 1 <sup>a</sup> | 0.03 (-0.04,0.1)         | 0.4     | 0            | -0.01 (-0.1,0.05) | 0.7     |
|                         | Model 2 <sup>b</sup> | 0.02 (-0.05,0.1)         | 0.5     | 0            | 0.02 (-0.03,0.1)  | 0.4     |
|                         | Model 3 <sup>c</sup> | 0.03 (-0.04,0.1)         | 0.4     | 0            | 0.02 (-0.03,0.1)  | 0.4     |
|                         |                      | % Change (95% CI)        | P-value | Ref Group    | % Change (95% CI) | P-value |
| Insulin (mu/l)**        | Model 1 <sup>a</sup> | 1 (0.9,1.1)              | 1.0     | 0            | 1.1 (1,1.2)       | 0.1     |
|                         | Model 2 <sup>b</sup> | 1 (0.9,1.1)              | 0.9     | 0            | 1 (0.9,1.1)       | 0.4     |
|                         | Model 3 <sup>c</sup> | 1 (0.9,1.1)              | 1.0     | 0            | 1 (1,1.1)         | 0.4     |
| Pro-Insulin (pmol/l)**  | Model 1 <sup>a</sup> | 1 (0.9,1.2)              | 0.4     | 0            | 1.1 (1,1.2)       | 0.1     |
|                         | Model 2 <sup>b</sup> | 1 (0.9,1.1)              | 0.5     | 0            | 1.1 (1,1.1)       | 0.2     |
|                         | Model 3 <sup>c</sup> | 1 (0.9,1.1)              | 0.6     | 0            | 1.1 (1,1.1)       | 0.1     |
| Triglyceride (mmol/l)** | Model 1 <sup>a</sup> | 0.9 (0.9,1)              | 0.1     | 0            | 0.9 (0.9,1)       | 0.004   |
|                         | Model 2 <sup>b</sup> | 0.9 (0.9,1)              | 0.1     | 0            | 0.9 (0.8,1)       | 0.001   |
|                         | Model 3 <sup>c</sup> | 0.9 (0.9,1)              | 0.0     | 0            | 0.9 (0.8,1)       | 0.001   |
| CRP (mg/l)**            | Model 1 <sup>a</sup> | 0.9 (0.8,1.1)            | 0.5     | 0            | 1.1 (0.9,1.3)     | 0.4     |
|                         | Model 2 <sup>b</sup> | 0.9 (0.8,1.2)            | 0.6     | 0            | 1 (0.8,1.1)       | 0.7     |
|                         | Model 3 <sup>c</sup> | 0.9 (0.8,1.1)            | 0.4     | 0            | 1 (0.8,1.1)       | 0.7     |
| Glucose (mmol/l)**      | Model 1 <sup>a</sup> | 1 (1,1)                  | 0.6     | 0            | 1 (1,1)           | 0.2     |
|                         | Model 2 <sup>b</sup> | 1 (1,1)                  | 0.5     | 0            | 1 (1,1)           | 0.3     |
|                         | Model 3 <sup>c</sup> | 1 (1,1)                  | 0.5     | 0            | 1 (1,1)           | 0.3     |

\* Mean difference compared with 16-27 months

\*\* Log transformed

<sup>a</sup> Unadjusted model

<sup>b</sup> Adjusted for age, ethnicity, social class, education, pre-pregnancy BMI, ever smoking during pregnancy

<sup>c</sup> Adjusted for age, ethnicity, social class, education, pre-pregnancy BMI, ever smoking during pregnancy and BMI at follow-up clinic

**Web table 5** - Unadjusted, confounder and mediator analysis of the association between inter-birth interval and non-blood based cardiovascular risk factors using complete case data (N=792)

|                                   |                      | Inter-pregnancy interval |         |              |                     |         |
|-----------------------------------|----------------------|--------------------------|---------|--------------|---------------------|---------|
|                                   |                      | ≤15 months               |         | 16-27 months | >27 months          |         |
|                                   |                      | β* (95% CI)              | P-value | Ref Group    | β* (95% CI)         | P-value |
| Avg. Arterial Distensibility (mm) | Model 1 <sup>a</sup> | 0.002 (-0.02,0.02)       | 0.8     | 0            | 0.02 (0.004,0.04)   | 0.02    |
|                                   | Model 2 <sup>b</sup> | 0.002 (-0.02,0.02)       | 0.8     | 0            | 0.01 (-0.004,0.03)  | 0.1     |
|                                   | Model 3 <sup>c</sup> | 0.002 (-0.02,0.02)       | 0.9     | 0            | 0.01 (-0.004,0.03)  | 0.1     |
| Common Carotid Intima (mm)        | Model 1 <sup>a</sup> | 0.01 (-0.005,0.02)       | 0.3     | 0            | -0.001 (-0.01,0.01) | 0.9     |
|                                   | Model 2 <sup>b</sup> | 0.01 (-0.005,0.02)       | 0.2     | 0            | 0.01 (-0.005,0.01)  | 0.3     |
|                                   | Model 3 <sup>c</sup> | 0.01 (-0.005,0.02)       | 0.3     | 0            | 0.005 (-0.005,0.01) | 0.3     |
| Total body fat mass (kg)          | Model 1 <sup>a</sup> | 0.02 (-1.8,1.8)          | 1.0     | 0            | 0.6 (-0.8,2.1)      | 0.4     |
|                                   | Model 2 <sup>b</sup> | -0.4 (-1.7,1)            | 0.6     | 0            | -0.3 (-1.4,0.8)     | 0.6     |
|                                   | Model 3 <sup>c</sup> | -0.4 (-1.7,1)            | 0.6     | 0            | -0.3 (-1.4,0.8)     | 0.6     |
| BMI (kg/m <sup>2</sup> )          | Model 1 <sup>a</sup> | 0.1 (-0.7,0.9)           | 0.8     | 0            | 0.4 (-0.3,1.1)      | 0.3     |
|                                   | Model 2 <sup>b</sup> | 0 (-0.5,0.5)             | 1.0     | 0            | 0 (-0.5,0.4)        | 0.9     |
|                                   | Model 3 <sup>c</sup> | 0 (-0.5,0.5)             | 1.0     | 0            | 0 (-0.5,0.4)        | 0.9     |
| Waist (cm)                        | Model 1 <sup>a</sup> | -0.01 (-2,2)             | 1.0     | 0            | 0.8 (-0.8,2.4)      | 0.3     |
|                                   | Model 2 <sup>b</sup> | -0.2 (-1.7,1.3)          | 0.8     | 0            | 0.3 (-1,1.5)        | 0.7     |
|                                   | Model 3 <sup>c</sup> | -0.2 (-1.1,0.7)          | 0.7     | 0            | 0.3 (-0.4,1.1)      | 0.4     |
| Systolic BP (mm hg)               | Model 1 <sup>a</sup> | 0.3 (-1.9,2.6)           | 0.8     | 0            | -0.4 (-2.2,1.5)     | 0.7     |
|                                   | Model 2 <sup>b</sup> | 0.2 (-2.1,2.4)           | 0.9     | 0            | -0.7 (-2.6,1.2)     | 0.4     |
|                                   | Model 3 <sup>c</sup> | 0.1 (-2.1,2.3)           | 0.9     | 0            | -0.8 (-2.6,1.1)     | 0.4     |
| Diastolic BP (mm hg)              | Model 1 <sup>a</sup> | 0.2 (-1.3,1.6)           | 0.8     | 0            | -0.2 (-1.5,1)       | 0.7     |
|                                   | Model 2 <sup>b</sup> | 0.01 (-1.5,1.5)          | 1.0     | 0            | -0.6 (-1.9,0.6)     | 0.3     |
|                                   | Model 3 <sup>c</sup> | -0.02 (-1.5,1.5)         | 1.0     | 0            | -0.6 (-1.9,0.6)     | 0.3     |
| Heart Rate                        | Model 1 <sup>a</sup> | 0.5 (-1.4,2.5)           | 0.6     | 0            | -0.02 (-1.6,1.6)    | 1.0     |
|                                   | Model 2 <sup>b</sup> | 0.1 (-1.9,2.1)           | 0.9     | 0            | -0.3 (-2.1,1.4)     | 0.7     |
|                                   | Model 3 <sup>c</sup> | 0.1 (-1.9,2.1)           | 0.9     | 0            | -0.3 (-2.1,1.4)     | 0.7     |

\* Mean difference compared with 16-27 months

<sup>a</sup> Unadjusted model

<sup>b</sup> Adjusted for 1 age, 1 ethnicity, social class, education, pre-pregnancy BMI, ever smoking during pregnancy

<sup>c</sup> Adjusted for age, ethnicity, social class, education, pre-pregnancy BMI, ever smoking during pregnancy and BMI at follow-up clinic

1  
2  
3  
4  
5  
6  
7  
8  
9  
10  
11  
12  
13  
14  
15  
16  
17  
18  
19  
20  
21  
22  
23  
24  
25  
26  
27  
28  
29  
30  
31  
32  
33  
34  
35  
36  
37  
38  
39  
40  
41  
42  
43  
44  
45  
46  
47  
48  
49  
50  
51  
52  
53  
54  
55  
56  
57  
58  
59  
60

For peer review only

STROBE 2007 (v4) Statement—Checklist of items that should be included in reports of cohort studies

| Section/Topic             | Item # | Recommendation                                                                                                                                                                       | Reported on page # |
|---------------------------|--------|--------------------------------------------------------------------------------------------------------------------------------------------------------------------------------------|--------------------|
| Title and abstract        | 1      | (a) Indicate the study’s design with a commonly used term in the title or the abstract                                                                                               | 1                  |
|                           |        | (b) Provide in the abstract an informative and balanced summary of what was done and what was found                                                                                  | 3                  |
| <b>Introduction</b>       |        |                                                                                                                                                                                      |                    |
| Background/rationale      | 2      | Explain the scientific background and rationale for the investigation being reported                                                                                                 | 5                  |
| Objectives                | 3      | State specific objectives, including any prespecified hypotheses                                                                                                                     | 5                  |
| <b>Methods</b>            |        |                                                                                                                                                                                      |                    |
| Study design              | 4      | Present key elements of study design early in the paper                                                                                                                              | 6                  |
| Setting                   | 5      | Describe the setting, locations, and relevant dates, including periods of recruitment, exposure, follow-up, and data collection                                                      | 6-8                |
| Participants              | 6      | (a) Give the eligibility criteria, and the sources and methods of selection of participants. Describe methods of follow-up                                                           | 6-8 & figure 1     |
|                           |        | (b) For matched studies, give matching criteria and number of exposed and unexposed                                                                                                  | n/a                |
| Variables                 | 7      | Clearly define all outcomes, exposures, predictors, potential confounders, and effect modifiers. Give diagnostic criteria, if applicable                                             | 6-8                |
| Data sources/ measurement | 8*     | For each variable of interest, give sources of data and details of methods of assessment (measurement). Describe comparability of assessment methods if there is more than one group | 6-8                |
| Bias                      | 9      | Describe any efforts to address potential sources of bias                                                                                                                            | 17-18 & web tables |
| Study size                | 10     | Explain how the study size was arrived at                                                                                                                                            | 6-9 & figure 1     |
| Quantitative variables    | 11     | Explain how quantitative variables were handled in the analyses. If applicable, describe which groupings were chosen and why                                                         | 8                  |
| Statistical methods       | 12     | (a) Describe all statistical methods, including those used to control for confounding                                                                                                | 8-9                |
|                           |        | (b) Describe any methods used to examine subgroups and interactions                                                                                                                  | 8-9                |
|                           |        | (c) Explain how missing data were addressed                                                                                                                                          | 8-9                |
|                           |        | (d) If applicable, explain how loss to follow-up was addressed                                                                                                                       | 17                 |
|                           |        | (e) Describe any sensitivity analyses                                                                                                                                                | 8-9                |
| <b>Results</b>            |        |                                                                                                                                                                                      |                    |

|                          |     |                                                                                                                                                                                                              |                 |
|--------------------------|-----|--------------------------------------------------------------------------------------------------------------------------------------------------------------------------------------------------------------|-----------------|
| Participants             | 13* | (a) Report numbers of individuals at each stage of study—eg numbers potentially eligible, examined for eligibility, confirmed eligible, included in the study, completing follow-up, and analysed            | 9 & Figure 1    |
|                          |     | (b) Give reasons for non-participation at each stage                                                                                                                                                         | 9 & Figure 1    |
|                          |     | (c) Consider use of a flow diagram                                                                                                                                                                           | Figure 1        |
| Descriptive data         | 14* | (a) Give characteristics of study participants (eg demographic, clinical, social) and information on exposures and potential confounders                                                                     | 10 & 12         |
|                          |     | (b) Indicate number of participants with missing data for each variable of interest                                                                                                                          | Web table       |
|                          |     | (c) Summarise follow-up time (eg, average and total amount)                                                                                                                                                  | 13              |
| Outcome data             | 15* | Report numbers of outcome events or summary measures over time                                                                                                                                               | 13              |
| Main results             | 16  | (a) Give unadjusted estimates and, if applicable, confounder-adjusted estimates and their precision (eg, 95% confidence interval). Make clear which confounders were adjusted for and why they were included |                 |
|                          |     | (b) Report category boundaries when continuous variables were categorized                                                                                                                                    | 15 & 16         |
|                          |     | (c) If relevant, consider translating estimates of relative risk into absolute risk for a meaningful time period                                                                                             |                 |
| Other analyses           | 17  | Report other analyses done—eg analyses of subgroups and interactions, and sensitivity analyses                                                                                                               | 14 & web tables |
| <b>Discussion</b>        |     |                                                                                                                                                                                                              |                 |
| Key results              | 18  | Summarise key results with reference to study objectives                                                                                                                                                     | 17              |
| <b>Limitations</b>       |     |                                                                                                                                                                                                              |                 |
| Interpretation           | 20  | Give a cautious overall interpretation of results considering objectives, limitations, multiplicity of analyses, results from similar studies, and other relevant evidence                                   | 17-18           |
| Generalisability         | 21  | Discuss the generalisability (external validity) of the study results                                                                                                                                        | 17-18           |
| <b>Other information</b> |     |                                                                                                                                                                                                              |                 |
| Funding                  | 22  | Give the source of funding and the role of the funders for the present study and, if applicable, for the original study on which the present article is based                                                | 19              |

\*Give information separately for cases and controls in case-control studies and, if applicable, for exposed and unexposed groups in cohort and cross-sectional studies.

**Note:** An Explanation and Elaboration article discusses each checklist item and gives methodological background and published examples of transparent reporting. The STROBE checklist is best used in conjunction with this article (freely available on the Web sites of PLoS Medicine at <http://www.plosmedicine.org/>, Annals of Internal Medicine at <http://www.annals.org/>, and Epidemiology at <http://www.epidem.com/>). Information on the STROBE Initiative is available at [www.strobe-statement.org](http://www.strobe-statement.org).



**Is inter-pregnancy interval associated with cardiovascular risk factors in later life? : a cohort study**

|                                 |                                                                                                                                                                                                                                                                                                            |
|---------------------------------|------------------------------------------------------------------------------------------------------------------------------------------------------------------------------------------------------------------------------------------------------------------------------------------------------------|
| Journal:                        | <i>BMJ Open</i>                                                                                                                                                                                                                                                                                            |
| Manuscript ID:                  | bmjopen-2013-004173.R1                                                                                                                                                                                                                                                                                     |
| Article Type:                   | Research                                                                                                                                                                                                                                                                                                   |
| Date Submitted by the Author:   | 24-Jan-2014                                                                                                                                                                                                                                                                                                |
| Complete List of Authors:       | Knipe, Duleeka; University of Bristol, School of Social and Community Medicine<br>Fraser, Abigail; University of Bristol, School of Social and Community Medicine<br>Lawlor, Debbie; University of Bristol, School of Social and Community Medicine<br>Howe, Laura; University of Bristol, Social Medicine |
| <b>Primary Subject Heading</b>: | Epidemiology                                                                                                                                                                                                                                                                                               |
| Secondary Subject Heading:      | Public health                                                                                                                                                                                                                                                                                              |
| Keywords:                       | ALSPAC, Inter-pregnancy interval, Cardiovascular disease , Later-life, Women, Pregnancy                                                                                                                                                                                                                    |
|                                 |                                                                                                                                                                                                                                                                                                            |

SCHOLARONE™  
Manuscripts

Peer review only



**Is inter-pregnancy interval associated with cardiovascular risk factors in later life? : a cohort study**

1  
2  
3  
4 Duleeka W Knipe, PhD student<sup>1\*</sup>, Abigail Fraser, research fellow<sup>1,2</sup>, Debbie A Lawlor, professor of epidemiology<sup>1,2</sup>,  
5  
6 Laura D Howe, research fellow<sup>1,2</sup>  
7  
8  
9

10 <sup>1</sup>School of Social and Community Medicine, University of Bristol, Bristol, United Kingdom  
11

12 <sup>2</sup>MRC Integrative Epidemiology Unit at the University of Bristol, United Kingdom  
13  
14  
15  
16  
17

18 This work was carried out at the School of Social and Community Medicine, University of Bristol  
19  
20  
21

22 \*Corresponding author  
23

24 School of Social and Community Medicine  
25  
26

27 University of Bristol  
28  
29

30 Canynge Hall  
31

32 39 Whatley Road  
33

34 Bristol  
35

36 BS8 2PS  
37

38 Tel. 0117 928 7302  
39

40 Fax. 0117 928 7325  
41

42 dee.knipe@bristol.ac.uk  
43  
44  
45  
46  
47  
48  
49  
50  
51  
52  
53  
54  
55  
56  
57  
58  
59  
60

**Keywords**

ALSPAC

Inter-pregnancy interval

Cardiovascular disease

Later-life

Women

Pregnancy

**Word count** (excluding title page, abstract, references, figures and tables) : 3147

For peer review only

**ABSTRACT**

**Objectives:** Pregnancy represents a metabolic challenge to women; in a normal pregnancy, transient metabolic changes occur that support the needs of the growing fetus. It is possible that repeating this challenge within a relatively short amount of time may result in lasting damage to the woman's cardiovascular health. Conversely, it is also possible that long inter-pregnancy intervals (IPI) may reflect subfertility, which has been found to be associated with cardiovascular disease (CVD). We examine the associations of short and long IPI with measures of cardiovascular health.

**Design:** Prospective Cohort

**Setting:** Mothers of the Avon Longitudinal Study of Parents and Children (ALSPAC)

**Participants:** Women with two live births in order to control for confounding by parity

**Outcome Measures:** Arterial distensibility, common carotid intima, adiposity, blood pressure, lipids, glucose, insulin, pro-insulin, triglycerides, C-reactive protein

**Results:** Twenty five percent (n=3451) of ALSPAC mothers had provided sufficient data to determine full reproductive history - of these 1477, had two live births, with 54% mothers having non-missing data on all variables required for our analyses. A total of 1268 mothers with IPI (inter-birth interval minus 9 months gestation) had cardiovascular disease risk factors measured/imputed at mean age 48 years. After adjusting for confounding, we found no association of either short ( $\leq 15$  months) or long ( $> 27$  months) IPI and increased levels of cardiovascular risk factors. There was some suggestion that women with both long and short IPI had a more favourable lipid profile compared with women whose IPI was 16-27 months, however the differences were small in magnitude and imprecisely estimated.

**Conclusion:** This study does not support the hypothesis that either long or short IPI is a risk factor for later cardiovascular health.

## ARTICLE SUMMARY

**Article focus:** To examine the associations of short and long inter-pregnancy interval with measures of cardiovascular health

**Key Message:** This study does not support the hypothesis that either long or short inter-pregnancy interval is a risk factor for later cardiovascular health

### Strengths and limitations of this study

#### Strengths

- Its prospective design with detailed data on reproductive history
- The availability of a wide range of objectively-measured CVD risk factors and the large sample size.
- First study to examine the association of inter-pregnancy interval (IPI) with cardiovascular risk factors.

#### Limitations

- As with other prospective cohort studies there was loss to follow-up, with those attending and completing all questionnaires tending to come from a higher socioeconomic background.
- Our analyses was restricted to women who had two live births to remove confounding by parity, and means that our findings may not generalise to women who had three or more children. We did not find any evidence of any strong differences between women who had either only one birth or three or more births, with women with two live/still births
- IPI was calculated by subtracting the average gestation period from the birth interval. We do not believe that this would have biased our findings as we used IPI as a categorical variable and therefore any fluctuations around the average 9 month gestation would not have altered the findings substantially.
- Only generalizable to a largely white European population.
- The population being studied are still young (mean age at clinic =48), it is possible that the association may emerge at older ages, when inter-individual variability in cardiovascular risk factors becomes greater.

## INTRODUCTION

Pregnancy represents a metabolic challenge to women; in a normal pregnancy, transient metabolic changes occur that support the needs of the growing foetus. Women become relatively insulin resistant, hyperlipidemic and experience up-regulation of coagulation factors and the inflammatory cascade.[1] A recent systematic review and meta-analysis found that a short inter-pregnancy interval (IPI) (<12 months) was associated with an increased risk of stillbirths, early neonatal death, preterm birth and low birth weight.[2] Associations between IPI and cardiovascular outcomes, however, are not known. Given the cardiovascular changes during pregnancy, it is possible that if this challenge is repeated within a relatively short amount of time the effects on a women's metabolic system may be exacerbated and/or be longer lasting. This may have a deleterious effect on her long term cardiovascular health.

Conversely, it is also possible that a long IPI is associated with increased cardiovascular risk. Longer IPIs may reflect subfertility, which has been found to be associated with cardiovascular disease (CVD).[3, 4]

Here we examine the associations of short and long IPI with measures of cardiovascular health (arterial distensibility, common carotid intima, adiposity, blood pressure, lipids, glucose, insulin, pro-insulin, triglycerides, C-reactive protein (CRP)) assessed at a mean age of 48years.

## METHODS

1  
2 The Avon Longitudinal Study of Parents and Children (ALSPAC) is a prospective population based birth  
3 cohort that recruited 14, 541 pregnant women resident in Avon, UK, who had expected delivery dates between 1<sup>st</sup>  
4 April 1991 and 31<sup>st</sup> December 1992. ALSPAC has previously been described in detail[5], and the study website  
5  
6 contains details of all the available data through a fully searchable data dictionary  
7  
8  
9  
10 (<http://www.bris.ac.uk/alspac/researchers/data-access/data-dictionary>). Ethical approval for the study was obtained  
11  
12 from the ALSPAC Ethics and Law Committee and the Local Research Ethics Committees.  
13

### Pregnancy data and IPI

14  
15  
16  
17  
18 In order to remove confounding by parity, which is known to be associated with CVD,[6-12] we restrict our  
19 analyses to women with two pregnancies resulting in live births (self-reported). Women were eligible for inclusion in  
20 this study if they had two pregnancies that resulted in live births and completed all the questionnaires necessary to  
21 ascertain full reproductive history. The study flow diagram is presented in figure 1.  
22  
23  
24  
25

26  
27 Upon recruitment into the cohort (approximately 18 weeks gestation), women were asked to complete a  
28 questionnaire about their health prior to the current pregnancy, including the number of previous pregnancies; the  
29 number of miscarriages/abortions; the outcome (live birth, still birth, miscarriage, abortion or termination, live born  
30 baby that died, live born baby still alive and other) and end date (i.e. delivery or other outcome) of their most recent  
31 previous pregnancy. We used these data, along with subsequent questionnaires (n=5) throughout the 18 year period  
32 leading to our outcome assessment to identify women who had two pregnancies that resulted in a live birth. We only  
33 included pregnancies that resulted in a live birth and the two pregnancies that we used for the interval could have  
34 included those occurring before or after the pregnancy at which women were recruited.  
35  
36  
37  
38  
39  
40  
41  
42  
43  
44

### Assessment of cardiovascular risk factors

45  
46  
47 Between 2009 and 2011 ALSPAC mothers (N=11, 264 women) were invited to a research clinic assessment  
48 at which a range of cardiovascular outcomes were assessed; this clinic took place between 1.6 and 20.3 years (median  
49 18) since the second birth defining the end of the IPI. Not all of these women were eligible for inclusion in our  
50 analysis as not all of them had full reproductive histories recorded.  
51  
52  
53  
54

55 Carotid intima media thickness (cIMT) for both the left and right common carotid artery scans were obtained  
56 via high-resolution B ultrasound and imaged longitudinally 1 cm proximal to the carotid bifurcation following a  
57  
58  
59  
60

1 standardized protocol using a ZONARE z.one Ultra convertible ultrasound system with L10-5 linear transducer.  
2 Images were focused on the posterior (far) wall of the artery and the zoom function was used to magnify the area.  
3  
4 Ten-second cine loops were recorded in DICOM format and analysed offline using Carotid Analyser for Research  
5 (Vascular Research Tools 5, Medical Imaging Applications, LLC 2008). Three consecutive cardiac cycles were  
6 identified and three measures of cIMT were taken from end-diastolic frames and averaged. This was done for both  
7  
8 right and left carotid arteries. Arterial distensibility was calculated as the difference between systolic and diastolic  
9  
10 arterial diameter. The mean of the left- and right-sided readings was used in analyses. The images were analysed by a  
11  
12 single trained reader. Blood pressure was measured while the women were lying down with the use of an Omron M6  
13  
14 monitor (Omron Healthcare UK Ltd, Milton Keynes, UK). Two readings of systolic and diastolic blood pressure were  
15  
16 recorded on each arm, and the mean of these 4 readings was used here. Heart rate was measured in both a seated and  
17  
18 standing position.  
19  
20  
21

22 Blood samples were taken after an overnight fast for those attending in the morning or after a minimum 6 hours  
23 fast for those attending the clinic after 14.00. Blood samples were obtained, centrifuged, separated, and frozen at  
24  
25  $-80^{\circ}\text{C}$  within 30 minutes. Plasma glucose was measured by automated enzymatic (hexokinase) method. Plasma  
26  
27 insulin was measured by an enzyme-linked immunosorbent assay (Mercodia, Uppsala, Sweden) that does not cross-  
28  
29 react with proinsulin or c-peptide, and proinsulin was also measured by an enzyme-linked immunosorbent assay  
30  
31 (Mercodia) that is a solid-phase 2-site enzyme immunoassay for the quantification of human proinsulin. Lipids were  
32  
33 measured by automated analyser with enzymatic methods. CRP was measured by automated particle-enhanced  
34  
35 immunoturbidimetric assay (Roche UK, Welwyn Garden City, UK).  
36  
37  
38

39 Whole body fat mass was measured using dual-energy x-ray absorptiometry (DXA) whole body scans.  
40  
41 Weight and height were measured with the subjects in light clothing and without shoes. Weight was measured to the  
42  
43 nearest 0.1 kg with the use of Tanita scales. Height was measured to the nearest 0.1 cm with a Harpenden stadiometer.  
44  
45 Waist circumference was measured twice to the nearest 1 mm at the midpoint between the lower ribs and the pelvic  
46  
47 bone with a flexible tape. The mean of the 2 measures is used here.  
48

49 A total of 4834 women attended clinic (43% response)[5]. Women attending clinic had a mean age of 48 years  
50  
51 Women pregnant at the time of clinic assessment were excluded from our analyses (n=7). Only 954 women attending  
52  
53 clinic and not pregnant at the time of clinic assessment, had full reproductive histories.  
54  
55  
56

### 57 **Measurement of Confounding factors**

58  
59  
60

1 Information on pre-pregnancy weight and height, smoking in pregnancy, single parent households, ethnicity,  
2 education, and social class were obtained from questionnaires completed at the time of recruitment during the index  
3 pregnancy. Ethnicity was categorised as white or non-white. Education was categorized as below or above university  
4 education. Household occupational social class was defined according to the 1991 British Office of Population and  
5 Census Statistics classification (classes I [professional/managerial] to V [unskilled manual workers]) using either the  
6 woman's occupation or her partners, whichever was highest. Smoking in pregnancy was categorized as ever or never  
7 smoked during pregnancy, at approximately 18-20 weeks gestation. Ideally, we would wish to measure these potential  
8 confounders in relation to the first pregnancy of the interval and for some to have time updated (i.e. also information  
9 from the second pregnancy) measurements. In this study, however, we only have data on the pregnancy when women  
10 were recruited and this is the first pregnancy of the interval for 30.9% of the women and the second for the remaining  
11 69%. Participant's age at clinic attendance was included as a confounding factor.  
12  
13  
14  
15  
16  
17  
18  
19  
20  
21  
22  
23

## 24 **Statistical Analysis**

25 Distributions of insulin, pro-insulin, triglyceride, CRP, glucose and low-density lipo-protein were right  
26 skewed, and so were log transformed for all regression model analyses, which ensured the residuals were  
27 approximately normally distributed. We compared women with sufficient data for us to detail their full reproductive  
28 history with those women with insufficient data, in terms of all confounding variables. Similarly, we compared those  
29 women who formed our eligible sample (only 2 live births and not pregnant at the time of outcome assessment) with  
30 women with either only 1 birth or  $\geq 3$  more births, in terms of all confounding and outcome variables. Chi-squared  
31 tests for categorical data and t-tests for continuous normally distributed variables were performed. IPI was calculated  
32 as the difference between the dates of delivery of the two pregnancies, minus the average gestation period (9 months).  
33 IPI was grouped into three categories:  $\leq 15$  months, 16-27 and  $> 27$  months; these groups correspond to  $\leq 2$  years, 2-3  
34 years and  $> 3$  years between births.  
35  
36  
37  
38  
39  
40  
41  
42  
43  
44  
45  
46

47 The association between our categorised measure of IPI and each outcome was assessed using multiple linear  
48 regression, with and without adjustment for potential confounders, comparing both short and long IPI with the  
49 reference category of 16-27 months. All analysis was conducted in Stata/MP 12.0.  
50  
51  
52

53 In order to assess whether our results were biased as a result of some confounders being measured at the first  
54 pregnancy of the IPI for some women and the second for others, we stratified our results by whether the ALSPAC  
55 child was the first or second pregnancy of the interval.  
56  
57  
58  
59  
60



## Dealing with missing data

Within our eligible study sample of 1268, there was some missing data on potential confounders and outcome measurements (data on exposure had to be observed to be eligible). The extent of missing data varied from 0-29%, with blood based measures having the most missing data (web table 1). In order to increase efficiency and minimise selection bias, we imputed missing variables for eligible participants who had missing data on outcomes or confounders, using multivariate multiple imputation. We included all the exposure, confounder and outcome measures in the imputation equations. We used switching regression in Stata and carried out 20 cycles of regression switching and generated 20 imputation datasets. The main analysis results are obtained by averaging across the results from each of these 20 datasets using Rubin's rules and the standard errors for any regression coefficients (used to calculate p-values and 95% confidence intervals) take account of uncertainty in the imputations as well as uncertainty in the estimate.[13] We carried out all our linear regression analysis using both the imputed and complete case datasets. Web table 1 shows that the distributions of variables in the imputed and non-imputed/complete-case datasets were similar.

## RESULTS

### Sample description

A total of 3451 women out of 13,713 recruited women who had a live birth had sufficient data to describe a full reproductive history; of these 1970 were excluded because they had either just 1 (n=971) or  $\geq 3$  births (n=999). A further 4 were pregnant at the time of assessment and were excluded. Of the remaining 1477 women who had two live births, 147 were excluded as they were recruited into the cohort during their second pregnancy, with the most recent previous pregnancy resulting in a miscarriage, termination, still birth or "other" outcome. IPI could be calculated for 1268 of the remaining eligible women (95%). Of these women, 954 attended the clinic assessment in 2009-11 and 792 women had complete data for all outcome and confounder measures (figure 1). Thus, our complete case analysis was performed on 792 women, and analysis using multivariate multiple imputation included 1268 women. Women included in the complete case analysis versus women with missing data on covariates and/or outcome variables had similar IPI (web table 2).

Women who had a provided sufficient data to describe their full reproductive history were on average slightly older, from a higher socioeconomic background, more likely to be smokers and white, and less likely to be in a single parent household, compared with women with insufficient data to describe their full reproductive history (table 1).

1  
2  
3  
4  
5  
6  
7  
8  
9  
10  
11  
12  
13  
14  
15  
16  
17  
18  
19  
20  
21  
22  
23  
24  
25  
26  
27  
28  
29  
30  
31  
32  
33  
34  
35  
36  
37  
38  
39  
40  
41  
42  
43  
44  
45  
46  
47  
48  
49  
50  
51  
52  
53  
54  
55  
56  
57  
58  
59  
60

Women eligible for this study (two live births) were more likely to be smokers compared to women with either 1 or  $\geq 3$  births (web table 3). No clear differences with regard to the other confounding variables were observed. There were small differences observed in terms of cardiovascular risk factors (web table 3), with women with single and 3 or more pregnancies having slightly worse cardiovascular risk profile compared to women with 2 pregnancies.

For peer review only

TABLE 1 – Characteristics of women with full reproductive histories compared to those with incomplete reproductive histories as determined from five questionnaires

|                                           | Women with Incomplete Data<br>n=10262 | Women with Complete Data<br>n=3451 | P-value |
|-------------------------------------------|---------------------------------------|------------------------------------|---------|
| Categorical Variables - n (%)             |                                       |                                    |         |
| Ethnicity                                 | n=8653                                | n=3417                             |         |
| White                                     | 8381 (96.9)                           | 3370 (98.6)                        | <0.001  |
| Social Class                              | n=7927                                | n=3335                             |         |
| i                                         | 842 (10.6)                            | 664 (19.9)                         |         |
| ii                                        | 3099 (39.1)                           | 1601 (48.0)                        |         |
| iii (non-manual)                          | 2135 (26.9)                           | 738 (22.1)                         | <0.001  |
| iii (manual)                              | 1261 (15.9)                           | 258 (7.7)                          |         |
| iv & v                                    | 590 (7.4)                             | 74 (2.2)                           |         |
| Education                                 | n=8739                                | n=3425                             |         |
| University Level or above                 | 826 (9.5)                             | 742 (21.7)                         | <0.001  |
| Single Parent Household                   | n=9136                                | n=3403                             |         |
| Yes                                       | 616 (6.7)                             | 102 (3.0)                          | <0.001  |
| Ever smoked                               | n=9365                                | n=3441                             |         |
| Yes                                       | 5124 (54.7)                           | 1369 (39.8)                        | <0.001  |
| Continuous Variables - mean (SD*)         |                                       |                                    |         |
| Age at birth of the ALSPAC<br>index child | n=10258<br>27.4 (5.0)                 | n=3451<br>29.8 (4.4)               | <0.001  |

\* T-test for normally distributed data

### Participant characteristics

1  
2  
3  
4  
5  
6  
7  
8  
9  
10  
11  
12  
13  
14  
15  
16  
17  
18  
19  
20  
21  
22  
23  
24  
25  
26  
27  
28  
29  
30  
31  
32  
33  
34  
35  
36  
37  
38  
39  
40  
41  
42  
43  
44  
45  
46  
47  
48  
49  
50  
51  
52  
53  
54  
55  
56  
57  
58  
59  
60

The characteristics of women according to their IPI are presented in table 2. There were no noticeable differences between IPI categories in terms of pre-pregnancy BMI, ethnicity, social class, education, and smoking status. Women with a longer IPI, however, were more likely to be in single parent households and slightly younger compared to all other women (table 2). Table 3 presents the distribution of the outcome variables for all those women who attended the follow-up assessment in 2009-11 and who had an IPI calculated for this analysis.

For peer review only

TABLE 2 – Characteristics of women by inter-pregnancy interval N=1268

|                                          |                                        | Inter-pregnancy interval of all included women |                     |                     |         |
|------------------------------------------|----------------------------------------|------------------------------------------------|---------------------|---------------------|---------|
|                                          |                                        | n=1268                                         |                     |                     |         |
|                                          |                                        | ≤15 months                                     | 16-27 months        | >27 months          | p-value |
|                                          |                                        | n=269                                          | n=412               | n=582               |         |
| <b>Continuous Variables - mean (SD)*</b> |                                        |                                                |                     |                     |         |
|                                          | Age at birth of the ALSPAC index child | n=269<br>30.4 (3.7)                            | n=412<br>30.2 (3.6) | n=582<br>29.3 (4.3) | <0.001  |
|                                          | Pre-Pregnancy BMI (kg/m2) **           | n=256<br>22.6 (2.9)                            | n=391<br>22.5 (3.4) | n=534<br>22.7 (3.4) | 0.6     |
| <b>Categorical Variables - n (%)</b>     |                                        |                                                |                     |                     |         |
|                                          | Ethnicity                              | n=267                                          | n=411               | n=577               | 0.4     |
|                                          | White                                  | 265 (99.3)                                     | 406 (98.8)          | 566 (98.1)          |         |
|                                          | Social Class                           | n=261                                          | n=409               | n=568               |         |
|                                          | I (highest; professional)              | 59 (22.6)                                      | 89 (21.8)           | 109 (19.2)          |         |
|                                          | ii                                     | 127 (48.7)                                     | 198 (48.4)          | 274 (48.2)          |         |
|                                          | iii (non-manual)                       | 54 (20.7)                                      | 74 (18.1)           | 141 (24.8)          | 0.2     |
|                                          | iii (manual)                           | 17 (6.5)                                       | 37 (9.1)            | 34 (6.0)            |         |
|                                          | iv & v (lowest; unskilled manual)      | 4 (1.5)                                        | 11 (2.7)            | 10 (1.8)            |         |
|                                          | Education                              | n=269                                          | n=411               | n=580               | 0.4     |
|                                          | University Level or above              | 66 (24.5)                                      | 82 (20.0)           | 124 (21.4)          |         |
|                                          | Single Parent household                | n=269                                          | n=412               | n=578               | <0.001  |
|                                          | Yes                                    | 1 (0.4)                                        | 3 (0.7)             | 24 (4.2)            |         |
|                                          | Smoked during pregnancy **             | n=268                                          | n=412               | n=581               | 1.0     |
|                                          | Yes                                    | 101 (38.0)                                     | 152 (37.0)          | 2013 (36.7)         |         |

\* SD - Standard Deviation

\*\* Relates to the first child in some women and second in others

TABLE 3 – Distribution of pre-pregnancy BMI and outcomes at research clinic assessment (2009-11) with IPI

|                                        | n=  | Inter-pregnancy interval n=1268 |     |                       |     |                     |
|----------------------------------------|-----|---------------------------------|-----|-----------------------|-----|---------------------|
|                                        |     | ≤15 months<br>n=271             | n=  | 16-27 months<br>n=415 | n=  | >27 months<br>n=582 |
| <b>Mean (Standard deviation)</b>       |     |                                 |     |                       |     |                     |
| Pre-pregnancy BMI (kg/m <sup>2</sup> ) | 260 | 22.6(2.8)                       | 399 | 22.5(3.4)             | 553 | 22.7(3.4)           |
| BMI (kg/m <sup>2</sup> )               | 203 | 25.9(4.5)                       | 313 | 25.8(4.7)             | 433 | 26.1(4.8)           |
| Waist (cm)                             | 203 | 82.6(11.4)                      | 313 | 82.6(11.2)            | 433 | 83.3(11.2)          |
| SBP (mm hg)                            | 202 | 118.1(12.5)                     | 304 | 118(12.3)             | 424 | 117.4(12.5)         |
| DBP (mm hg)                            | 202 | 71.7(8.3)                       | 304 | 71.7(8.5)             | 424 | 71.4(8.1)           |
| Heart rate                             | 202 | 84.3(11.1)                      | 304 | 83.7(10.7)            | 424 | 83.6(11)            |
| Fat Mass (kg)                          | 204 | 26(10.1)                        | 314 | 25.9(9.9)             | 428 | 26.3(10.1)          |
| Avg. Arterial Distensibility (mm)      | 204 | 0.5(0.1)                        | 315 | 0.5(0.1)              | 430 | 0.5(0.1)            |
| Common Carotid Intima (mm)             | 204 | 0.6(0.1)                        | 315 | 0.6(0.1)              | 430 | 0.6(0.1)            |
| Cholesterol (mmol/l)                   | 194 | 4.9(0.8)                        | 303 | 5(0.9)                | 410 | 4.9(0.9)            |
| High-density Lipoprotein (mmol/l)      | 194 | 1.5(0.4)                        | 303 | 1.5(0.4)              | 410 | 1.5(0.4)            |
| Non-HDL cholesterol (mmol/l)           | 194 | 3.4(0.9)                        | 303 | 3.5(0.9)              | 410 | 3.4(0.9)            |
| <b>Median (Inter-quartile range)</b>   |     |                                 |     |                       |     |                     |
| Insulin (mu/l)                         | 193 | 4.3(3.2,6.4)                    | 301 | 4.3(3,6.3)            | 408 | 4.6(3.3,6.8)        |
| Pro-Insulin (pu/l)                     | 194 | 5(3.6,7.3)                      | 302 | 4.9(3.5,6.6)          | 409 | 5.1(3.6,7.9)        |
| Triglyceride (mmol/l)                  | 194 | 0.8(0.6,1.1)                    | 303 | 0.9(0.7,1.2)          | 410 | 0.9(0.7,1.1)        |
| C-reactive protein (mg/l)              | 194 | 0.9(0.4,1.9)                    | 303 | 0.9(0.5,2)            | 410 | 1(0.5,2.5)          |
| Glucose (mmol/l)                       | 194 | 5.2(4.9,5.4)                    | 303 | 5.2(4.9,5.4)          | 410 | 5.1(4.9,5.4)        |

### Association between IPI and CVD risk factors

1  
2 Crude associations of IPI with outcomes are presented in table 4 and 5. We found no evidence that women  
3  
4 with either short or long IPI had more adverse cardiovascular risk factors compared with women with an IPI between  
5  
6 16-27 months. There was some suggestion that women with both long and short IPI had a more favourable lipid  
7  
8 profile compared with women whose IPI was 16-27 months, however the differences were small in magnitude and  
9  
10 imprecisely estimated, with the 95% confidence interval including the null value.

11  
12 Adjustment for potential confounders or for potential mediation by BMI at outcome assessment did not change results  
13  
14 (tables 4, 5 and web table 4). These findings are similar to the results when the analysis was restricted to complete  
15  
16 cases (web table 5 and 6). The results were also similar when the women were stratified according to whether the  
17  
18 ALSPAC child was the first or second pregnancy (results not shown – available from authors on request)  
19  
20  
21  
22  
23  
24  
25  
26  
27  
28  
29  
30  
31  
32  
33  
34  
35  
36  
37  
38  
39  
40  
41  
42  
43  
44  
45  
46  
47  
48  
49  
50  
51  
52  
53  
54  
55  
56  
57  
58  
59  
60

TABLE 4 – Unadjusted and confounder adjusted analysis of the association between inter-pregnancy interval and blood based cardiovascular risk factors using multivariate multiply imputed data (N=1268)

|                         | Analysis Model Number | Inter-pregnancy interval |              |           |                   |         |
|-------------------------|-----------------------|--------------------------|--------------|-----------|-------------------|---------|
|                         |                       | ≤15 months               | 16-27 months | Ref Group | >27 months        |         |
|                         |                       | β* (95% CI)              | P-value      |           | β* (95% CI)       | P-value |
| Cholesterol (mmol/l)    | Model 1 <sup>a</sup>  | -0.1 (-0.2,0.1)          | 0.3          | 0         | -0.1 (-0.2,0.03)  | 0.1     |
|                         | Model 2 <sup>b</sup>  | -0.1 (-0.3,0.1)          | 0.2          | 0         | -0.05 (-0.2,0.1)  | 0.4     |
| HDL (mmol/l)            | Model 1 <sup>a</sup>  | 0.03 (-0.04,0.1)         | 0.4          | 0         | -0.01 (-0.1,0.05) | 0.8     |
|                         | Model 2 <sup>b</sup>  | 0.03 (-0.04,0.1)         | 0.4          | 0         | 0.01 (0,0.1)      | 0.6     |
|                         |                       | % Change (95% CI)        | P-value      | Ref Group | % Change (95% CI) | P-value |
| Insulin (mu/l)**        | Model 1 <sup>a</sup>  | 1 (0.9,1.1)              | 0.8          | 0         | 1.1 (1,1.2)       | 0.1     |
|                         | Model 2 <sup>b</sup>  | 1 (0.9,1.1)              | 0.9          | 0         | 1 (1,1.1)         | 0.4     |
| Pro-Insulin (pmol/l)**  | Model 1 <sup>a</sup>  | 1 (0.9,1.1)              | 0.7          | 0         | 1.1 (1,1.1)       | 0.1     |
|                         | Model 2 <sup>b</sup>  | 1 (0.9,1.1)              | 0.8          | 0         | 1 (1,1.1)         | 0.2     |
| Triglyceride (mmol/l)** | Model 1 <sup>a</sup>  | 0.9 (0.9,1)              | 0.1          | 0         | 0.9 (0.9,1)       | 0.03    |
|                         | Model 2 <sup>b</sup>  | 0.9 (0.9,1)              | 0.1          | 0         | 0.9 (0.9,1)       | 0.02    |
| CRP (mg/l)**            | Model 1 <sup>a</sup>  | 0.9 (0.8,1.1)            | 0.4          | 0         | 1.1 (0.9,1.2)     | 0.4     |
|                         | Model 2 <sup>b</sup>  | 0.9 (0.8,1.1)            | 0.5          | 0         | 1 (0.9,1.2)       | 0.6     |
| Glucose (mmol/l)**      | Model 1 <sup>a</sup>  | 1 (1,1)                  | 0.7          | 0         | 1 (1,1)           | 0.4     |
|                         | Model 2 <sup>b</sup>  | 1 (1,1)                  | 0.6          | 0         | 1 (1,1)           | 0.3     |

\* Mean difference compared with 16-27 months

\*\* Log transformed

<sup>a</sup> Unadjusted model

<sup>b</sup> Adjusted for maternal age, maternal ethnicity, social class, education, pre-pregnancy BMI, ever smoking during pregnancy



TABLE 5 - Unadjusted and confounder adjusted analysis of the association between inter-pregnancy interval and non-blood based cardiovascular risk factors using multivariate multiply imputed data (N=1268)

|                          | Analysis             | Inter-pregnancy interval |             |              |                      |             |
|--------------------------|----------------------|--------------------------|-------------|--------------|----------------------|-------------|
|                          |                      | ≤15 months               |             | 16-27 months |                      |             |
|                          |                      |                          |             | Ref          | >27 months           |             |
|                          |                      | Model                    | β* (95% CI) | P-value      | Group                | β* (95% CI) |
| Avg. Arterial            | Model 1 <sup>a</sup> | -0.0003 (-0.02,0.02)     | 1           | 0            | 0.02 (0.001,0.04)    | 0.04        |
| Distensibility (mm)      | Model 2 <sup>b</sup> | 0.002 (-0.02,0.02)       | 0.9         | 0            | 0.01 (-0.003,0.03)   | 0.1         |
| Common Carotid           | Model 1 <sup>a</sup> | 0.005 (-0.01,0.02)       | 0.4         | 0            | -0.0008 (-0.01,0.01) | 0.9         |
| Intima (mm)              | Model 2 <sup>b</sup> | 0.003 (-0.01,0.01)       | 0.6         | 0            | 0.002 (-0.01,0.01)   | 0.7         |
| Total body fat mass      | Model 1 <sup>a</sup> | -0.2 (-1.7,1.3)          | 0.8         | 0            | 0.4 (-0.8,1.7)       | 0.5         |
| (kg) <sup>c</sup>        | Model 2 <sup>b</sup> | -0.3 (-1.6,0.9)          | 0.6         | 0            | -0.05 (-1.1,1)       | 0.9         |
| BMI (kg/m <sup>2</sup> ) | Model 1 <sup>a</sup> | 0.03 (-0.7,0.8)          | 0.9         | 0            | 0.3 (-0.3,0.9)       | 0.3         |
|                          | Model 2 <sup>b</sup> | -0.02 (-0.6,0.5)         | 0.9         | 0            | 0 (-0.4,0.5)         | 0.8         |
| Waist (cm)               | Model 1 <sup>a</sup> | -0.1 (-1.8,1.6)          | 0.9         | 0            | 0.6 (-0.8,2.1)       | 0.4         |
|                          | Model 2 <sup>b</sup> | -0.3 (-1.7,1.1)          | 0.7         | 0            | 0.1 (-1.1,1.4)       | 0.8         |
| Systolic BP (mm hg)      | Model 1 <sup>a</sup> | 0.1 (-1.9,2.2)           | 0.9         | 0            | -0.6 (-2.3,1.2)      | 0.5         |
|                          | Model 2 <sup>b</sup> | 0.1 (-1.9,2.1)           | 0.9         | 0            | -0.5 (-2.3,1.2)      | 0.5         |
| Diastolic BP (mm hg)     | Model 1 <sup>a</sup> | 0.1 (-1.3,1.4)           | 0.9         | 0            | -0.4 (-1.6,0.8)      | 0.5         |
|                          | Model 2 <sup>b</sup> | 0.1 (-1.2,1.5)           | 0.9         | 0            | -0.5 (-1.7,0.7)      | 0.4         |
| Heart Rate               | Model 1 <sup>a</sup> | 0.4 (-1.6,2.4)           | 0.7         | 0            | 0 (-1.7,1.6)         | 1           |
|                          | Model 2 <sup>b</sup> | 0.3 (-1.7,2.4)           | 0.7         | 0            | 0 (-1.6,1.7)         | 1           |

\* Mean difference compared with 16-27 months

<sup>a</sup> Unadjusted model

<sup>b</sup> Adjusted for age, ethnicity, social class, education, pre-pregnancy BMI, ever smoking during pregnancy

<sup>c</sup> Height and height<sup>2</sup> were included into the model

## DISCUSSION

1  
2 We found no association between short or long IPI and levels of cardiovascular risk factors in a cohort of  
3 women with a mean age of 48 years. This is in contrast to our initial hypotheses that shorter IPIs may give a woman's  
4 cardiovascular system insufficient time to recover, that longer IPIs may reflect subfertility and that both may be  
5 associated with adverse levels of cardiovascular risk factors. We actually found weak evidence that women with both  
6 short ( $\leq 15$  months) and long IPIs ( $> 27$ ) had a more favourable lipid profile (i.e. the opposite of our initial hypotheses)  
7 compared with women with an IPI between 16 and 27 months, but the associations were not large, were imprecisely  
8 estimated, and were not consistent across all outcomes and may be due to chance.  
9

10  
11 To our knowledge, this is the first study to examine the relationship between pregnancy interval and  
12 subsequent cardiovascular outcomes. Several previous studies have examined the association of parity with  
13 cardiovascular outcomes, with most,[6-12] though not all,[14-16] finding that greater parity is related to more adverse  
14 risk factors and greater disease risk. A recent study investigated this association in a population of 1.3 million, using  
15 the Swedish registry data,[12] and found a J-shaped relationship between parity and CVD risk, with both nulliparous  
16 and grand multiparous ( $\geq 5$  births) having elevated risk compared to those women with 2 births. One possible  
17 mechanism for this association is that multiparous women are more likely to have births closer together, and the  
18 repeating of the cardiovascular challenge within a relatively short amount of time may lead to the effects on a  
19 women's metabolic system to be exacerbated and/or be longer lasting. Our findings do not support this hypothesis.  
20 Our results therefore suggest that the association of parity with greater CVD risk may be through another mechanism.  
21 Possible theories for the mechanisms underlying the greater risk of CVD after 2 children are: 1) other adverse lifestyle  
22 factors being adopted as a family size increases; 2) socio-demographic and other characteristics associated with  
23 increased risk of CVD also being associated with having more children; 3) adverse metabolic disturbances  
24 accumulating over pregnancies.[12]  
25  
26

27  
28 The strengths of this study include the prospective design; detailed data on reproductive history; the  
29 availability of a wide range of objectively-measured CVD risk factors; and the large sample size. We were able to  
30 adjust for a range of potential confounding factors, and we restricted our analyses to women who had two live births in  
31 order to remove confounding by parity. To the best of our knowledge, we are the first study to examine the association  
32 of IPI with cardiovascular risk factors. The findings of this study however should be considered in light of several  
33 limitations. As with other prospective cohort studies there was loss to follow-up, with those attending and completing  
34 all questionnaires tending to come from a higher socioeconomic background. This means that the women included in  
35  
36  
37  
38  
39  
40  
41  
42  
43  
44  
45  
46  
47  
48  
49  
50  
51  
52  
53  
54  
55  
56  
57  
58  
59  
60

our analysis are not a representative sample of the full ALSPAC cohort; some studies suggest that lack of generalisability does not necessarily result in selection bias [17-20], but we cannot be certain of this from the current analysis and replication of our results in other studies with different distributions of socio-demographic variables would be beneficial. Missing data would bias our results if the association between IPI and cardiovascular risk factors differed in those included in our analyses and those excluded due to missing data. We are unable to test this assumption, but have no reason to suspect that it may be violated. One important consideration when interpreting our results is that we have restricted our analyses to women who had two live births. Whilst we feel that this was a sensible analysis strategy in order to remove confounding by parity, it means that our findings may not generalise to women who had three or more children. We did not find any evidence of any strong differences between women who had either only one birth or three or more births, with women with two live/still births (web table 3). IPI was calculated by subtracting the average gestation period (9 months) from the birth interval, ideally we would have liked to have calculated exact gestation periods for each live birth. We do not, however, believe that this would have biased our findings as we used IPI as a categorical variable and therefore any fluctuations around the average 9 month gestation would not have altered the findings substantially. It is possible that by calculating our IPI in this way we have attenuated our results towards the null. A further limitation of this study is these findings are only generalizable to a largely white European population with a higher socioeconomic status. As the population being studied are still young (mean age at clinic =48), it is possible that the association may emerge at older ages, when inter-individual variability in cardiovascular risk factors becomes greater. Ideally we would have measured pre-pregnancy BMI and smoking during pregnancy for the first pregnancy of all women. Due to our study design, this was not possible. These measurements are from the first pregnancy in some women and the second pregnancy in others. There is therefore the possibility that these measurements are not a reasonable representation of levels in the first pregnancy for all women; this may lead to residual confounding. However given that the associations we observe are null, we do not think this has biased our results.

In conclusion, our results do not support an association between IPI and cardiovascular risk factors, though our findings must be interpreted in light of the large losses to follow-up and limitations in our measurement of IPI. Further studies in other populations with more detailed data on gestational age at delivery of all pregnancies, in different settings such as low income countries where the social patterning of IPI may differ and in older women with greater inter-individual variability in cardiovascular risk factors would provide a more comprehensive understanding of these associations.

1  
2  
3  
4  
5  
6  
7  
8  
9  
10  
11  
12  
13  
14  
15  
16  
17  
18  
19  
20  
21  
22  
23  
24  
25  
26  
27  
28  
29  
30  
31  
32  
33  
34  
35  
36  
37  
38  
39  
40  
41  
42  
43  
44  
45  
46  
47  
48  
49  
50  
51  
52  
53  
54  
55  
56  
57  
58  
59  
60

For peer review only

## ACKNOWLEDGEMENTS

We are extremely grateful to all the families who took part in this study, the midwives for their help in recruiting them, and the whole ALSPAC team, which includes interviewers, computer and laboratory technicians, clerical workers, research scientists, volunteers, managers, receptionists and nurses. This publication is the work of the authors and DWK will serve as guarantor for the contents of this paper.

## COMPETING INTERESTS

None declared

## FUNDING

The work was supported by the British Heart Foundation [SP/07/008/24066], the UK Medical Research Council [0701594 to A.F and G1002375 to LH] and the Wellcome Trust (and WT099874MA to D.W.K ). AF, DAL and LDH work in a unit that receives funding from the UK Medical Research Council and the University of Bristol. The UK Medical Research Council ([074882], the Wellcome Trust [WT076467] and the University of Bristol provide core funding support for ALSPAC.

## AUTHOR CONTRIBUTIONS

DAL, LH and AF conceived the study idea; DWK, LH and AF developed the analysis plan; DWK undertook the analysis under the supervision of LH and AF; DWK wrote the first draft of the paper and collated co-author feedback; and all authors contributed to the critical review and final version.

## DATA SHARING

This study is based on the ALSPAC study. ALSPAC has a detailed data sharing policy which can be found at : <http://www.bristol.ac.uk/alspac/researchers/data-access/policy/>

## REFERENCES

- 1 N. Sattar, Do pregnancy complications and CVD share common antecedents? *Atheroscler Suppl* 2004;**5**:3-7
- 2 A. Wendt, C. M. Gibbs, S. Peters, et al., Impact of increasing inter-pregnancy interval on maternal and infant health. *Paediatric and perinatal epidemiology* 2012;**26 Suppl 1**:239-58
- 3 C. G. Solomon, F. B. Hu, A. Dunaif, et al., Menstrual cycle irregularity and risk for future cardiovascular disease. *The Journal of clinical endocrinology and metabolism* 2002;**87**:2013-7
- 4 N. I. Parikh, S. Cnattingius, M. A. Mittleman, et al., Subfertility and risk of later life maternal cardiovascular disease. *Human reproduction* 2012;**27**:568-75
- 5 A. Fraser, C. Macdonald-Wallis, K. Tilling, et al., Cohort Profile: The Avon Longitudinal Study of Parents and Children: ALSPAC mothers cohort. *Int J Epidemiol* 2012;**97**:110
- 6 F. Atsma, M. L. Bartelink, D. E. Grobbee, et al., Reproductive factors, metabolic factors, and coronary artery calcification in older women. *Menopause* 2008;**15**:899-904
- 7 J. M. Catov, A. B. Newman, K. Sutton-Tyrrell, et al., Parity and cardiovascular disease risk among older women: how do pregnancy complications mediate the association? *Ann Epidemiol* 2008;**18**:873-9
- 8 L. G. Gallagher, L. B. Davis, R. M. Ray, et al., Reproductive history and mortality from cardiovascular disease among women textile workers in Shanghai, China. *International Journal of Epidemiology* 2011;**40**:1510-1518
- 9 A. Green, V. Beral and K. Moser, Mortality in Women in Relation to Their Childbearing History. *Brit Med J* 1988;**297**:391-395
- 10 D. H. Jaffe, Z. Eisenbach and O. Manor, The effect of parity on cause-specific mortality among married men and women. *Matern Child Health J* 2011;**15**:376-85
- 11 R. B. Ness, T. Harris, J. Cobb, et al., Number of pregnancies and the subsequent risk of cardiovascular disease. *N Engl J Med* 1993;**328**:1528-33
- 12 N. I. Parikh, S. Cnattingius, P. W. Dickman, et al., Parity and risk of later-life maternal cardiovascular disease. *American heart journal* 2010;**159**:215-221 e6
- 13 P. Royston, Multiple imputation of missing values. *Stata J* 2004;**4**:227-241
- 14 H. S. Chang, N. Odongua, H. Ohrr, et al., Reproductive risk factors for cardiovascular disease mortality among postmenopausal women in Korea: the Kangwha Cohort Study, 1985-2005. *Menopause* 2011;**18**:1205-12
- 15 G. A. Colditz, W. C. Willett, M. J. Stampfer, et al., A prospective study of age at menarche, parity, age at first birth, and coronary heart disease in women. *Am J Epidemiol* 1987;**126**:861-70
- 16 K. Steenland, C. Lally and M. Thun, Parity and coronary heart disease among women in the American Cancer Society CPS II population. *Epidemiology* 1996;**7**:641-3
- 17 A. J. Sogaard, R. Selmer, E. Bjertness, et al., The Oslo Health Study: The impact of self-selection in a large, population-based survey. *International journal for equity in health* 2004;**3**:3
- 18 A. J. Van Loon, M. Tjhuis, H. S. Picavet, et al., Survey non-response in the Netherlands: effects on prevalence estimates and associations. *Ann Epidemiol* 2003;**13**:105-10
- 19 R. M. Nilsen, S. E. Vollset, H. K. Gjessing, et al., Self-selection and bias in a large prospective pregnancy cohort in Norway. *Paediatric and perinatal epidemiology* 2009;**23**:597-608
- 20 E. A. Nohr, M. Frydenberg, T. B. Henriksen, et al., Does low participation in cohort studies induce bias? *Epidemiology* 2006;**17**:413-8

FIGURES LEGENDS

1  
2  
3  
4  
5  
6  
7  
8  
9  
10  
11  
12  
13  
14  
15  
16  
17  
18  
19  
20  
21  
22  
23  
24  
25  
26  
27  
28  
29  
30  
31  
32  
33  
34  
35  
36  
37  
38  
39  
40  
41  
42  
43  
44  
45  
46  
47  
48  
49  
50  
51  
52  
53  
54  
55  
56  
57  
58  
59  
60

Figure 1 – Flow-chart of selection of women for analysis

For peer review only

**Is inter-pregnancy interval associated with cardiovascular risk factors in later life? : a cohort study**

1  
2  
3  
4 Duleeka W Knipe, PhD student<sup>1\*</sup>, Abigail Fraser, research fellow<sup>1,2</sup>, Debbie A Lawlor, professor of epidemiology<sup>1,2</sup>,  
5  
6 Laura D Howe, research fellow<sup>1,2</sup>  
7  
8  
9

10 <sup>1</sup>School of Social and Community Medicine, University of Bristol, Bristol, United Kingdom  
11

12 <sup>2</sup>MRC Integrative Epidemiology Unit at the University of Bristol, United Kingdom  
13  
14  
15  
16  
17

18 This work was carried out at the School of Social and Community Medicine, University of Bristol  
19  
20  
21

22 \*Corresponding author  
23

24 School of Social and Community Medicine  
25  
26

27 University of Bristol  
28  
29

30 Canynge Hall  
31

32 39 Whatley Road  
33

34 Bristol  
35

36 BS8 2PS  
37

38 Tel. 0117 928 7302  
39

40 Fax. 0117 928 7325  
41

42 dee.knipe@bristol.ac.uk  
43  
44  
45  
46  
47  
48  
49  
50  
51  
52  
53  
54  
55  
56  
57  
58  
59  
60



**Keywords**

ALSPAC

Inter-pregnancy interval

Cardiovascular disease

Later-life

Women

Pregnancy

**Word count** (excluding title page, abstract, references, figures and tables) : 3147

For peer review only

1  
2  
3  
4  
5  
6  
7  
8  
9  
10  
11  
12  
13  
14  
15  
16  
17  
18  
19  
20  
21  
22  
23  
24  
25  
26  
27  
28  
29  
30  
31  
32  
33  
34  
35  
36  
37  
38  
39  
40  
41  
42  
43  
44  
45  
46  
47  
48  
49  
50  
51  
52  
53  
54  
55  
56  
57  
58  
59  
60

## ABSTRACT

**Objectives:** Pregnancy represents a metabolic challenge to women; in a normal pregnancy, transient metabolic changes occur that support the needs of the growing fetus. It is possible that repeating this challenge within a relatively short amount of time may result in lasting damage to the woman's cardiovascular health. Conversely, it is also possible that long inter-pregnancy intervals (IPI) may reflect subfertility, which has been found to be associated with cardiovascular disease (CVD). We examine the associations of short and long inter-pregnancy interval/IPI with measures of cardiovascular health.

**Design:** Prospective Cohort

**Setting:** Mothers of the Avon Longitudinal Study of Parents and Children (ALSPAC)

**Participants:** Women with two live births in order to control for confounding by parity

**Outcome Measures:** Arterial distensibility, common carotid intima, adiposity, blood pressure, lipids, glucose, insulin, pro-insulin, triglycerides, C-reactive protein

**Results:** Twenty five percent (n=3451) of ALSPAC mothers had provided sufficient data to determine full reproductive history - of these 1477, had two live births, with 54% mothers having non-missing data on all variables required for our analyses. A total of 1268 mothers with IPI (inter-birth interval minus 9 months gestation) from the (ALSPAC), who had cardiovascular disease risk factors measured/imputed at mean age 48 years. After adjusting for confounding, we found no association of either short ( $\leq 15$  months) or long ( $> 27$  months) inter-pregnancy interval/IPI and increased levels of cardiovascular risk factors. There was some suggestion that women with both long and short inter-pregnancy interval/IPI had a more favourable lipid profile compared with women whose inter-pregnancy interval/IPI was 16-27 months, however the differences were small in magnitude and imprecisely estimated.

**Conclusion:** This study does not support the hypothesis that either long or short inter-pregnancy interval/IPI is a risk factor for later cardiovascular health.

## ARTICLE SUMMARY

**Article focus:** To examine the associations of short and long inter-pregnancy interval with measures of cardiovascular health

**Key Message:** This study does not support the hypothesis that either long or short inter-pregnancy interval is a risk factor for later cardiovascular health

### Strengths and limitations of this study

#### Strengths

- Its prospective design with detailed data on reproductive history
- The availability of a wide range of objectively-measured CVD risk factors and the large sample size.
- First study to examine the association of inter-pregnancy interval (IPI) with cardiovascular risk factors.

#### Limitations

- As with other prospective cohort studies there was loss to follow-up, with those attending and completing all questionnaires tending to come from a higher socioeconomic background.
- Our analyses was restricted to women who had two live births to remove confounding by parity, and means that our findings may not generalise to women who had three or more children. We did not find any evidence of any strong differences between women who had either only one birth or three or more births, with women with two live/still births
- ~~Inter-pregnancy interval~~IPI was calculated by subtracting the average gestation period from the birth interval. We do not believe that this would have biased our findings as we used ~~inter-pregnancy interval~~IPI as a categorical variable and therefore any fluctuations around the average 9 month gestation would not have altered the findings substantially.
- Only generalizable to a largely white European population.
- The population being studied are still young (mean age at clinic =48), it is possible that the association may emerge at older ages, when inter-individual variability in cardiovascular risk factors becomes greater.

## INTRODUCTION

Pregnancy represents a metabolic challenge to women; in a normal pregnancy, transient metabolic changes occur that support the needs of the growing foetus. Women become relatively insulin resistant, hyperlipidemic and experience up-regulation of coagulation factors and the inflammatory cascade.[1] A recent systematic review and meta-analysis found that a short inter-pregnancy interval (IPI) (<12 months) was associated with an increased risk of stillbirths, early neonatal death, preterm birth and low birth weight.[2] Associations between ~~inter-pregnancy interval~~IPI and cardiovascular outcomes, however, are not known. Given the cardiovascular changes during pregnancy, it is possible that if this challenge is repeated within a relatively short amount of time the effects on a women's metabolic system may be exacerbated and/or be longer lasting. This may have a deleterious effect on her long term cardiovascular health.

Conversely, it is also possible that a long ~~inter-pregnancy interval~~IPI is associated with increased cardiovascular risk. Longer ~~inter-pregnancy interval~~IPIs may reflect subfertility, which has been found to be associated with cardiovascular disease (CVD).[3, 4]

Here we examine the associations of short and long ~~inter-pregnancy interval~~IPI with measures of cardiovascular health (arterial distensibility, common carotid intima, adiposity, blood pressure, lipids, glucose, insulin, pro-insulin, triglycerides, C-reactive protein (CRP)) assessed at a mean age of 48years.

## METHODS

1  
2 The Avon Longitudinal Study of Parents and Children (ALSPAC) is a prospective population based birth  
3 cohort that recruited 14, 541 pregnant women resident in Avon, UK, who had expected delivery dates between 1<sup>st</sup>  
4 April 1991 and 31<sup>st</sup> December 1992. ALSPAC has previously been described in detail[5], and the study website  
5  
6  
7  
8 contains details of all the available data through a fully searchable data dictionary  
9  
10 (<http://www.bris.ac.uk/alspac/researchers/data-access/data-dictionary>). Ethical approval for the study was obtained  
11  
12 from the ALSPAC Ethics and Law Committee and the Local Research Ethics Committees.  
13

### Pregnancy data and ~~inter-pregnancy interval~~PI

14  
15  
16  
17  
18 In order to remove confounding by parity, which is known to be associated with CVD,[6-12] we restrict our  
19 analyses to women with two pregnancies resulting in live births (self-reported). Women were eligible for inclusion in  
20 this study if they had two pregnancies that resulted in live births and completed all the questionnaires necessary to  
21 ascertain full reproductive history. The study flow diagram is presented in figure 1.  
22  
23  
24

25  
26 Upon recruitment into the cohort (approximately 18 weeks gestation), women were asked to complete a  
27 questionnaire about their health prior to the current pregnancy, including the number of previous pregnancies; the  
28 number of miscarriages/abortions; the outcome (live birth, still birth, miscarriage, abortion or termination, live born  
29 baby that died, live born baby still alive and other) and end date (i.e. delivery or other outcome) of their most recent  
30 previous pregnancy. We used these data, along with subsequent questionnaires (n=5) throughout the 18 year period  
31 leading to our outcome assessment to identify women who had two pregnancies that resulted in a live birth. We only  
32 included pregnancies that resulted in a live birth and the two pregnancies that we used for the interval could have  
33 included those occurring before or after the pregnancy at which women were recruited.  
34  
35  
36  
37  
38  
39  
40  
41  
42  
43  
44

### Assessment of cardiovascular risk factors

45  
46  
47 Between 2009 and 2011 ~~ALSPAC mothers eligible participants~~ (N=11, 264 women) were invited to a  
48 research clinic assessment at which a range of cardiovascular outcomes were assessed; this clinic took place between  
49 1.6 and 20.3 years (median 18) since the second birth ~~defining the end~~ of the ~~pregnancy interval exposure~~PI. ~~Not all~~  
50  
51  
52  
53  
54 ~~of these women were eligible for inclusion in our analysis as not all of them had full reproductive histories recorded.~~

55 Carotid intima media thickness (cIMT) for both the left and right common carotid artery scans were obtained  
56 via high-resolution B ultrasound and imaged longitudinally 1 cm proximal to the carotid bifurcation following a  
57  
58  
59  
60

1  
2  
3  
4  
5  
6  
7  
8  
9  
10  
11  
12  
13  
14  
15  
16  
17  
18  
19  
20  
21  
22  
23  
24  
25  
26  
27  
28  
29  
30  
31  
32  
33  
34  
35  
36  
37  
38  
39  
40  
41  
42  
43  
44  
45  
46  
47  
48  
49  
50  
51  
52  
53  
54  
55  
56  
57  
58  
59  
60

standardized protocol using a ZONARE z.one Ultra convertible ultrasound system with L10-5 linear transducer. Images were focused on the posterior (far) wall of the artery and the zoom function was used to magnify the area. Ten-second cine loops were recorded in DICOM format and analysed offline using Carotid Analyser for Research (Vascular Research Tools 5, Medical Imaging Applications, LLC 2008). Three consecutive cardiac cycles were identified and three measures of cIMT were taken from end-diastolic frames and averaged. This was done for both right and left carotid arteries. Arterial distensibility was calculated as the difference between systolic and diastolic arterial diameter. The mean of the left- and right-sided readings was used in analyses. The images were analysed by a single trained reader. Blood pressure was measured while the women were lying down with the use of an Omron M6 monitor (Omron Healthcare UK Ltd, Milton Keynes, UK). Two readings of systolic and diastolic blood pressure were recorded on each arm, and the mean of these 4 readings was used here. Heart rate was measured in both a seated and standing position.

Blood samples were taken after an overnight fast for those attending in the morning or after a minimum 6 hours fast for those attending the clinic after 14.00. Blood samples were obtained, centrifuged, separated, and frozen at  $-80^{\circ}\text{C}$  within 30 minutes. Plasma glucose was measured by automated enzymatic (hexokinase) method. Plasma insulin was measured by an enzyme-linked immunosorbent assay (Merckodia, Uppsala, Sweden) that does not cross-react with proinsulin or c-peptide, and proinsulin was also measured by an enzyme-linked immunosorbent assay (Merckodia) that is a solid-phase 2-site enzyme immunoassay for the quantification of human proinsulin. Lipids were measured by automated analyser with enzymatic methods. CRP was measured by automated particle-enhanced immunoturbidimetric assay (Roche UK, Welwyn Garden City, UK).

Whole body fat mass was measured using dual-energy x-ray absorptiometry (DXA) whole body scans. Weight and height were measured with the subjects in light clothing and without shoes. Weight was measured to the nearest 0.1 kg with the use of Tanita scales. Height was measured to the nearest 0.1 cm with a Harpenden stadiometer. Waist circumference was measured twice to the nearest 1 mm at the midpoint between the lower ribs and the pelvic bone with a flexible tape. The mean of the 2 measures is used here.

A total of ~~48345,005~~ women attended clinic (434% response)[5]. Women attending clinic had a mean age of 48 years. Women pregnant at the time of clinic assessment were excluded from our analyses (n=7). Only 954 women attending clinic and not pregnant at the time of clinic assessment, had full reproductive histories.

### Measurement of Confounding factors

Information on pre-pregnancy weight and height, smoking in pregnancy, single parent households, ethnicity, education, and social class were obtained from questionnaires completed at the time of recruitment during the index pregnancy. Ethnicity was categorised as white or non-white. Education was categorized as below or above university education. Household occupational social class was defined according to the 1991 British Office of Population and Census Statistics classification (classes I [professional/managerial] to V [unskilled manual workers]) using either the woman's occupation or her partners, whichever was highest. Smoking in pregnancy was categorized as ever or never smoked during pregnancy, at approximately 18-20 weeks gestation. Ideally, we would wish to measure these potential confounders in relation to the first pregnancy of the interval and for some to have time updated (i.e. also information from the second pregnancy) measurements. In this study, however, we only have data on the pregnancy when women were recruited and this is the first pregnancy of the interval for 30.9% of the women and the second for the remaining 69%. -Participant's age at clinic attendance was included as a confounding factor.

### Statistical Analysis

Distributions of insulin, pro-insulin, triglyceride, CRP, glucose and low-density lipo-protein were right skewed, and so were log transformed for all regression model analyses, which ensured the residuals were approximately normally distributed. We compared women with sufficient data for us to detail their full reproductive history with those women with insufficient data, in terms of all confounding variables. Similarly, we compared those women who formed our eligible sample (only 2 live births and not pregnant at the time of outcome assessment) with women with either only 1 birth or  $\geq 3$  more births, in terms of all confounding and outcome variables. Chi-squared tests for categorical data and t-tests for continuous normally distributed variables were performed. Inter-pregnancy interval|IPI was calculated as the difference between the dates of delivery of the two pregnancies, minus the average gestation period (9 months). Inter-pregnancy interval|IPI was grouped into three categories:  $\leq 15$  months, 16-27 and  $> 27$  months; these groups correspond to  $\leq 2$  years, 2-3 years and  $> 3$  years between births.

The association between our categorised measure of inter-pregnancy interval|IPI and each outcome was assessed using multiple linear regression, with and without adjustment for potential confounders, comparing both short and long inter-pregnancy interval|IPI with the reference category of 16-27 months. All analysis was conducted in Stata/MP 12.0.

In order to assess whether our results were biased as a result of some confounders being measured at the first pregnancy of the IPI for some women and the second for others, we stratified our results by whether the ALSPAC child was the first or second pregnancy of the interval.

### Dealing with missing data

Within our eligible study sample of 1268, there was some missing data on potential confounders and outcome measurements (data on exposure had to be observed to be eligible). The extent of missing data varied from 0-29%, with blood based measures having the most missing data (web table 15). In order to increase efficiency and minimise selection bias, we imputed missing variables for eligible participants who had missing data on outcomes or confounders, using multivariate multiple imputation. We included all the exposure, confounder and outcome measures in the imputation equations. We used switching regression in Stata and carried out 20 cycles of regression switching and generated 20 imputation datasets. The main analysis results are obtained by averaging across the results from each of these 20 datasets using Rubin's rules and the standard errors for any regression coefficients (used to calculate p-values and 95% confidence intervals) take account of uncertainty in the imputations as well as uncertainty in the estimate.[13] We carried out all our linear regression analysis using both the imputed and complete case datasets. Web table 1 shows that the distributions of variables in the imputed and non-imputed/complete-case datasets were similar.

## RESULTS

### Sample description

A total of 3451 women out of 13,713 recruited women who had a live birth had sufficient data to describe a full reproductive history; of these 1970 were excluded because they had either just 1 (n=971) or  $\geq 3$  births (n=999). A further 4 were pregnant at the time of assessment and were excluded. Of the remaining 1477 women who had two live births, 147 were excluded as they were recruited into the cohort during their second pregnancy, with the most recent previous pregnancy resulting in a miscarriage, termination, still birth or "other" outcome. Inter-pregnancy interval|IPI could be calculated for 1268 of the remaining eligible women (95%). Of these women, 954 attended the clinic assessment in 2009-11 and 792 women had complete data for all outcome and confounder measures (figure 1). Thus, our complete case analysis was performed on 792 women, and analysis using multivariate multiple imputation included 1268 women. Women included in the complete case analysis versus women with missing data on covariates and/or outcome variables had similar IPI (web table 2).



1 Women who had a provided sufficient data to describe their full reproductive history were on average slightly  
2 older, from a higher socioeconomic background, more likely to be smokers and white, and less likely to be in a single  
3 parent household, compared with women with insufficient data to describe their full reproductive history (table 1).

4  
5 Women eligible for this study (two live births) were more likely to be smokers compared to women with either 1 or  $\geq 3$   
6 births (web table 43). No clear differences with regard to the other confounding variables were observed. There were  
7  
8 small differences observed in terms of cardiovascular risk factors (web table 43), with women with single and 3 or  
9  
10 more pregnancies having slightly worse cardiovascular risk profile compared to women with 2 pregnancies.  
11  
12  
13  
14  
15  
16  
17  
18  
19  
20  
21  
22  
23  
24  
25  
26  
27  
28  
29  
30  
31  
32  
33  
34  
35  
36  
37  
38  
39  
40  
41  
42  
43  
44  
45  
46  
47  
48  
49  
50  
51  
52  
53  
54  
55  
56  
57  
58  
59  
60

For peer review only

TABLE 1 – Characteristics of women with full reproductive histories compared to those with incomplete reproductive histories as determined from five questionnaires

|                                   | Women with Incomplete Data<br>n=10262 | Women with Complete Data<br>n=3451 | P-value |
|-----------------------------------|---------------------------------------|------------------------------------|---------|
| Categorical Variables - n (%)     |                                       |                                    |         |
| Ethnicity                         | n=8653                                | n=3417                             |         |
| White                             | 8381 (96.9)                           | 3370 (98.6)                        | <0.001  |
| Social Class                      | n=7927                                | n=3335                             |         |
| i                                 | 842 (10.6)                            | 664 (19.9)                         |         |
| ii                                | 3099 (39.1)                           | 1601 (48.0)                        |         |
| iii (non-manual)                  | 2135 (26.9)                           | 738 (22.1)                         | <0.001  |
| iii (manual)                      | 1261 (15.9)                           | 258 (7.7)                          |         |
| iv & v                            | 590 (7.4)                             | 74 (2.2)                           |         |
| Education                         | n=8739                                | n=3425                             |         |
| University Level or above         | 826 (9.5)                             | 742 (21.7)                         | <0.001  |
| Single Parent Household           | n=9136                                | n=3403                             |         |
| Yes                               | 616 (6.7)                             | 102 (3.0)                          | <0.001  |
| Ever smoked                       | n=9365                                | n=3441                             |         |
| Yes                               | 5124 (54.7)                           | 1369 (39.8)                        | <0.001  |
| Continuous Variables - mean (SD*) |                                       |                                    |         |
| <u>Age-Age at birth of the</u>    | n=10258                               | n=3451                             |         |
| <u>ALSPAC index child</u>         | 27.4 (5.0)                            | 29.8 (4.4)                         | <0.001  |

\* T-test for normally distributed data

### Participant characteristics

1  
2 The characteristics of women according to their ~~inter-pregnancy interval~~IPI are presented in table 2. There  
3  
4 were no noticeable differences between ~~inter-pregnancy interval~~IPI categories in terms of pre-pregnancy BMI,  
5  
6 ethnicity, social class, education, and smoking status. Women with a longer ~~inter-pregnancy interval~~IPI, however,  
7  
8 were more likely to be in single parent households and slightly younger compared to all other women (table 2). Table  
9  
10 3 presents the distribution of the outcome variables for all those women who attended the follow-up assessment in  
11  
12 2009-11 and who had an IPI calculated for this analysis.-  
13  
14  
15  
16  
17  
18  
19  
20  
21  
22  
23  
24  
25  
26  
27  
28  
29  
30  
31  
32  
33  
34  
35  
36  
37  
38  
39  
40  
41  
42  
43  
44  
45  
46  
47  
48  
49  
50  
51  
52  
53  
54  
55  
56  
57  
58  
59  
60

For peer review only

TABLE 2 – Characteristics of women by inter-pregnancy interval N=1268

|                                          |                                           | Inter-pregnancy interval of all included women |                     |                     |         |
|------------------------------------------|-------------------------------------------|------------------------------------------------|---------------------|---------------------|---------|
|                                          |                                           | n=1268                                         |                     |                     |         |
|                                          |                                           | ≤15 months                                     | 16-27 months        | >27 months          | p-value |
|                                          |                                           | n=269                                          | n=412               | n=582               |         |
| <b>Continuous Variables - mean (SD)*</b> |                                           |                                                |                     |                     |         |
|                                          | Age at birth of the ALSPAC index child    | n=269<br>30.4 (3.7)                            | n=412<br>30.2 (3.6) | n=582<br>29.3 (4.3) | <0.001  |
|                                          | Pre-Pregnancy BMI (kg/m <sup>2</sup> ) ** | n=256<br>22.6 (2.9)                            | n=391<br>22.5 (3.4) | n=534<br>22.7 (3.4) | 0.6     |
| <b>Categorical Variables - n (%)</b>     |                                           |                                                |                     |                     |         |
|                                          | Ethnicity                                 | n=267                                          | n=411               | n=577               | 0.4     |
|                                          | White                                     | 265 (99.3)                                     | 406 (98.8)          | 566 (98.1)          |         |
|                                          | Social Class                              | n=261                                          | n=409               | n=568               |         |
|                                          | I (highest; professional)                 | 59 (22.6)                                      | 89 (21.8)           | 109 (19.2)          |         |
|                                          | ii                                        | 127 (48.7)                                     | 198 (48.4)          | 274 (48.2)          |         |
|                                          | iii (non-manual)                          | 54 (20.7)                                      | 74 (18.1)           | 141 (24.8)          | 0.2     |
|                                          | iii (manual)                              | 17 (6.5)                                       | 37 (9.1)            | 34 (6.0)            |         |
|                                          | iv & v (lowest; unskilled manual)         | 4 (1.5)                                        | 11 (2.7)            | 10 (1.8)            |         |
|                                          | Education                                 | n=269                                          | n=411               | n=580               | 0.4     |
|                                          | University Level or above                 | 66 (24.5)                                      | 82 (20.0)           | 124 (21.4)          |         |
|                                          | Single Parent household                   | n=269                                          | n=412               | n=578               | <0.001  |
|                                          | Yes                                       | 1 (0.4)                                        | 3 (0.7)             | 24 (4.2)            |         |
|                                          | Smoked during pregnancy **                | n=268                                          | n=412               | n=581               | 1.0     |
|                                          | Yes                                       | 101 (38.0)                                     | 152 (37.0)          | 2013 (36.7)         |         |

\* SD - Standard Deviation

\*\* Relates to the first child in some women and second in others

TABLE 3 – Distribution of pre-pregnancy BMI and outcomes at research clinic assessment (2009-11) ~~in the full~~  
~~cohort~~with IPI

|                                        | n=  | Inter-pregnancy interval n=1268 |     |                       |     |                     |
|----------------------------------------|-----|---------------------------------|-----|-----------------------|-----|---------------------|
|                                        |     | ≤15 months<br>n=271             | n=  | 16-27 months<br>n=415 | n=  | >27 months<br>n=582 |
| <b>Mean (Standard deviation)</b>       |     |                                 |     |                       |     |                     |
| Pre-pregnancy BMI (kg/m <sup>2</sup> ) | 260 | 22.6(2.8)                       | 399 | 22.5(3.4)             | 553 | 22.7(3.4)           |
| BMI (kg/m <sup>2</sup> )               | 203 | 25.9(4.5)                       | 313 | 25.8(4.7)             | 433 | 26.1(4.8)           |
| Waist (cm)                             | 203 | 82.6(11.4)                      | 313 | 82.6(11.2)            | 433 | 83.3(11.2)          |
| SBP (mm hg)                            | 202 | 118.1(12.5)                     | 304 | 118(12.3)             | 424 | 117.4(12.5)         |
| DBP (mm hg)                            | 202 | 71.7(8.3)                       | 304 | 71.7(8.5)             | 424 | 71.4(8.1)           |
| Heart rate                             | 202 | 84.3(11.1)                      | 304 | 83.7(10.7)            | 424 | 83.6(11)            |
| Fat Mass (kg)                          | 204 | 26(10.1)                        | 314 | 25.9(9.9)             | 428 | 26.3(10.1)          |
| Avg. Arterial Distensibility (mm)      | 204 | 0.5(0.1)                        | 315 | 0.5(0.1)              | 430 | 0.5(0.1)            |
| Common Carotid Intima (mm)             | 204 | 0.6(0.1)                        | 315 | 0.6(0.1)              | 430 | 0.6(0.1)            |
| Cholesterol (mmol/l)                   | 194 | 4.9(0.8)                        | 303 | 5(0.9)                | 410 | 4.9(0.9)            |
| High-density Lipoprotein (mmol/l)      | 194 | 1.5(0.4)                        | 303 | 1.5(0.4)              | 410 | 1.5(0.4)            |
| Non-HDL cholesterol (mmol/l)           | 194 | 3.4(0.9)                        | 303 | 3.5(0.9)              | 410 | 3.4(0.9)            |
| <b>Median (Inter-quartile range)</b>   |     |                                 |     |                       |     |                     |
| Insulin (mu/l)                         | 193 | 4.3(3.2,6.4)                    | 301 | 4.3(3.6,3)            | 408 | 4.6(3.3,6.8)        |
| Pro-Insulin (pu/l)                     | 194 | 5(3.6,7.3)                      | 302 | 4.9(3.5,6.6)          | 409 | 5.1(3.6,7.9)        |
| Triglyceride (mmol/l)                  | 194 | 0.8(0.6,1.1)                    | 303 | 0.9(0.7,1.2)          | 410 | 0.9(0.7,1.1)        |
| C-reactive protein (mg/l)              | 194 | 0.9(0.4,1.9)                    | 303 | 0.9(0.5,2)            | 410 | 1(0.5,2.5)          |
| Glucose (mmol/l)                       | 194 | 5.2(4.9,5.4)                    | 303 | 5.2(4.9,5.4)          | 410 | 5.1(4.9,5.4)        |

### Association between inter-pregnancy intervalIPI and CVD risk factors

Crude associations of inter-pregnancy intervalIPI with outcomes are presented in table 4 and 5. We found no evidence that women with either short or long inter-pregnancy intervalIPI had more adverse cardiovascular risk factors compared with women with an inter-pregnancy intervalIPI between 16-27 months. There was some suggestion that women with both long and short inter-pregnancy intervalIPI had a more favourable lipid profile compared with women whose inter-pregnancy intervalIPI was 16-27 months, however the differences were small in magnitude and imprecisely estimated, with the 95% confidence interval including the null value.

Adjustment for potential confounders or for potential mediation by BMI at outcome assessment did not change results (tables 4, 5 and web table 43). These findings are similar to the results when the analysis was restricted to complete cases (web table 54 and 65). The results were also similar when the women were stratified according to whether the ALSPAC child was the first or second pregnancy (results not shown – available from authors on request)-

TABLE 4 – Unadjusted and confounder adjusted analysis of the association between inter-pregnancy interval and blood based cardiovascular risk factors using multivariate multiply imputed data (N=1268)

| IBI (months)            | Analysis Model Number | Inter-pregnancy interval |              |           |                   |         |
|-------------------------|-----------------------|--------------------------|--------------|-----------|-------------------|---------|
|                         |                       | ≤15 months               | 16-27 months | Ref Group | >27 months        |         |
|                         |                       | β* (95% CI)              | P-value      |           | β* (95% CI)       | P-value |
| Cholesterol (mmol/l)    | Model 1 <sup>a</sup>  | -0.1 (-0.2,0.1)          | 0.3          | 0         | -0.1 (-0.2,0.03)  | 0.1     |
|                         | Model 2 <sup>b</sup>  | -0.1 (-0.3,0.1)          | 0.2          | 0         | -0.05 (-0.2,0.1)  | 0.4     |
| HDL (mmol/l)            | Model 1 <sup>a</sup>  | 0.03 (-0.04,0.1)         | 0.4          | 0         | -0.01 (-0.1,0.05) | 0.8     |
|                         | Model 2 <sup>b</sup>  | 0.03 (-0.04,0.1)         | 0.4          | 0         | 0.01 (0,0.1)      | 0.6     |
|                         |                       | % Change (95% CI)        | P-value      | Ref Group | % Change (95% CI) | P-value |
| Insulin (mu/l)**        | Model 1 <sup>a</sup>  | 1 (0.9,1.1)              | 0.8          | 0         | 1.1 (1,1.2)       | 0.1     |
|                         | Model 2 <sup>b</sup>  | 1 (0.9,1.1)              | 0.9          | 0         | 1 (1,1.1)         | 0.4     |
| Pro-Insulin (pmol/l)**  | Model 1 <sup>a</sup>  | 1 (0.9,1.1)              | 0.7          | 0         | 1.1 (1,1.1)       | 0.1     |
|                         | Model 2 <sup>b</sup>  | 1 (0.9,1.1)              | 0.8          | 0         | 1 (1,1.1)         | 0.2     |
| Triglyceride (mmol/l)** | Model 1 <sup>a</sup>  | 0.9 (0.9,1)              | 0.1          | 0         | 0.9 (0.9,1)       | 0.03    |
|                         | Model 2 <sup>b</sup>  | 0.9 (0.9,1)              | 0.1          | 0         | 0.9 (0.9,1)       | 0.02    |
| CRP (mg/l)**            | Model 1 <sup>a</sup>  | 0.9 (0.8,1.1)            | 0.4          | 0         | 1.1 (0.9,1.2)     | 0.4     |
|                         | Model 2 <sup>b</sup>  | 0.9 (0.8,1.1)            | 0.5          | 0         | 1 (0.9,1.2)       | 0.6     |
| Glucose (mmol/l)**      | Model 1 <sup>a</sup>  | 1 (1,1)                  | 0.7          | 0         | 1 (1,1)           | 0.4     |
|                         | Model 2 <sup>b</sup>  | 1 (1,1)                  | 0.6          | 0         | 1 (1,1)           | 0.3     |

\* Mean difference compared with 16-27 months

\*\* Log transformed

<sup>a</sup> Unadjusted model

<sup>b</sup> Adjusted for maternal age, maternal ethnicity, social class, education, pre-pregnancy BMI, ever smoking during pregnancy

TABLE 5 - Unadjusted and confounder adjusted analysis of the association between inter-pregnancy interval and non-blood based cardiovascular risk factors using multivariate multiply imputed data (N=1268)

|                          | <u>Analysis</u>      | Inter-pregnancy interval  |               |              |                      |                |
|--------------------------|----------------------|---------------------------|---------------|--------------|----------------------|----------------|
|                          |                      | ≤15 months                |               | 16-27 months | >27 months           |                |
|                          |                      | <u>Model</u>              | <u>Number</u> | Ref          | <u>β* (95% CI)</u>   | <u>P-value</u> |
| Avg. Arterial            | Model 1 <sup>a</sup> | -0.0003 (-0.02,0.02)      | 1             | 0            | 0.02 (0.001,0.04)    | 0.04           |
| Distensibility (mm)      | Model 2 <sup>b</sup> | 0.002 (-0.02,0.02)        | 0.9           | 0            | 0.01 (-0.003,0.03)   | 0.1            |
| Common Carotid           | Model 1 <sup>a</sup> | <u>0.005</u> (-0.01,0.02) | 0.4           | 0            | -0.0008 (-0.01,0.01) | 0.9            |
| Intima (mm)              | Model 2 <sup>b</sup> | 0.003 (-0.01,0.01)        | 0.6           | 0            | 0.002 (-0.01,0.01)   | 0.7            |
| Total body fat mass      | Model 1 <sup>a</sup> | -0.2 (-1.7,1.3)           | 0.8           | 0            | 0.4 (-0.8,1.7)       | 0.5            |
| (kg) <sup>c</sup>        | Model 2 <sup>b</sup> | -0.3 (-1.6,0.9)           | 0.6           | 0            | -0.05 (-1.1,1)       | 0.9            |
| BMI (kg/m <sup>2</sup> ) | Model 1 <sup>a</sup> | <u>0.03</u> (-0.7,0.8)    | 0.9           | 0            | 0.3 (-0.3,0.9)       | 0.3            |
|                          | Model 2 <sup>b</sup> | -0.02 (-0.6,0.5)          | 0.9           | 0            | 0 (-0.4,0.5)         | 0.8            |
| Waist (cm)               | Model 1 <sup>a</sup> | -0.1 (-1.8,1.6)           | 0.9           | 0            | 0.6 (-0.8,2.1)       | 0.4            |
|                          | Model 2 <sup>b</sup> | -0.3 (-1.7,1.1)           | 0.7           | 0            | 0.1 (-1.1,1.4)       | 0.8            |
| Systolic BP (mm hg)      | Model 1 <sup>a</sup> | 0.1 (-1.9,2.2)            | 0.9           | 0            | -0.6 (-2.3,1.2)      | 0.5            |
|                          | Model 2 <sup>b</sup> | 0.1 (-1.9,2.1)            | 0.9           | 0            | -0.5 (-2.3,1.2)      | 0.5            |
| Diastolic BP (mm hg)     | Model 1 <sup>a</sup> | 0.1 (-1.3,1.4)            | 0.9           | 0            | -0.4 (-1.6,0.8)      | 0.5            |
|                          | Model 2 <sup>b</sup> | 0.1 (-1.2,1.5)            | 0.9           | 0            | -0.5 (-1.7,0.7)      | 0.4            |
| Heart Rate               | Model 1 <sup>a</sup> | 0.4 (-1.6,2.4)            | 0.7           | 0            | 0 (-1.7,1.6)         | 1              |
|                          | Model 2 <sup>b</sup> | 0.3 (-1.7,2.4)            | 0.7           | 0            | 0 (-1.6,1.7)         | 1              |

\* Mean difference compared with 16-27 months

<sup>a</sup> Unadjusted model

<sup>b</sup> Adjusted for age, ethnicity, social class, education, pre-pregnancy BMI, ever smoking during pregnancy

<sup>c</sup> Height and height<sup>2</sup> were included into the model



## DISCUSSION

We found no association between short or long [inter-pregnancy intervalIPI](#) and levels of cardiovascular risk factors in a cohort of women with a mean age of 48 years. This is in contrast to our initial hypotheses that shorter [inter-pregnancy intervalIPIs](#) may give a woman's cardiovascular system insufficient time to recover, that longer [inter-pregnancy intervalIPIs](#) may reflect subfertility and that both may be associated with adverse levels of cardiovascular risk factors. We actually found weak evidence that women with both short ( $\leq 15$  months) and long [inter-pregnancy intervalIPIs](#) ( $>27$ ) had a more favourable lipid profile (i.e. the opposite of our initial hypotheses) compared with women with an [inter-pregnancy intervalIPI](#) between 16 and 27 months, but the associations were not large, were imprecisely estimated, and were not consistent across all outcomes and may be due to chance.

To our knowledge, this is the first study to examine the relationship between pregnancy interval and subsequent cardiovascular outcomes. Several previous studies have examined the association of parity with cardiovascular outcomes, with most,<sup>[6-12]</sup> though not all,<sup>[14-16]</sup> finding that greater parity is related to more adverse risk factors and greater disease risk. A recent study investigated this association in a population of 1.3 million, using the Swedish registry data,<sup>[12]</sup> and found a J-shaped relationship between parity and CVD risk, with both nulliparous and grand multiparous ( $\geq 5$  births) having elevated risk compared to those women with 2 births. One possible mechanism for this association is that multiparous women are more likely to have births closer together, and the repeating of the cardiovascular challenge within a relatively short amount of time may lead to the effects on a women's metabolic system to be exacerbated and/or be longer lasting. Our findings do not support this hypothesis. Our results therefore suggest that the association of parity with greater CVD risk may be through another mechanism. Possible theories for the mechanisms underlying the greater risk of CVD after 2 children are: 1) other adverse lifestyle factors being adopted as a family size increases; 2) socio-demographic and other characteristics associated with increased risk of CVD also being associated with having more children; 3) adverse metabolic disturbances accumulating over pregnancies.<sup>[12]</sup>

The strengths of this study include the prospective design; detailed data on reproductive history; the availability of a wide range of objectively-measured CVD risk factors; and the large sample size. We were able to adjust for a range of potential confounding factors, and we restricted our analyses to women who had two live births in order to remove confounding by parity. To the best of our knowledge, we are the first study to examine the association of [inter-pregnancy intervalIPI](#) with cardiovascular risk factors. The findings of this study however should be

1 considered in light of several limitations. As with other prospective cohort studies there was loss to follow-up, with  
2 those attending and completing all questionnaires tending to come from a higher socioeconomic background. This  
3 means that the women included in our analysis are not a representative sample of the full ALSPAC cohort; some  
4 studies suggest that lack of generalisability does not necessarily result in selection bias [17-20], but we cannot be  
5 certain of this from the current analysis and replication of our results in other studies with different distributions of  
6 socio-demographic variables would be beneficial. Missing data would bias our results if the association between inter-  
7 pregnancy intervalIPI and cardiovascular risk factors differed in those included in our analyses and those excluded due  
8 to missing data. We are unable to test this assumption, but have no reason to suspect that it may be violated. One  
9 important consideration when interpreting our results is that we have restricted our analyses to women who had two  
10 live births. Whilst we feel that this was a sensible analysis strategy in order to remove confounding by parity, it means  
11 that our findings may not generalise to women who had three or more children. We did not find any evidence of any  
12 strong differences between women who had either only one birth or three or more births, with women with two  
13 live/still births (web table 13). Inter-pregnancy intervalIPI was calculated by subtracting the average gestation period  
14 (9 months) from the birth interval, ideally we would have liked to have calculated exact gestation periods for each live  
15 birth. We do not, however, believe that this would have biased our findings as we used inter-pregnancy intervalIPI as  
16 a categorical variable and therefore any fluctuations around the average 9 month gestation would not have altered the  
17 findings substantially. It is possible that by calculating our IPI in this way we have attenuated our results towards the  
18 null. A further limitation of this study is these findings are only generalizable to a largely white European population  
19 with a higher socioeconomic status. As the population being studied are still young (mean age at clinic =48), it is  
20 possible that the association may emerge at older ages, when inter-individual variability in cardiovascular risk factors  
21 becomes greater. Ideally we would have measured pre-pregnancy BMI and smoking during pregnancy for the first  
22 pregnancy of all women. Due to our study design, this was not possible. These measurements are from the first  
23 pregnancy in some women and the second pregnancy in others. There is therefore the possibility that these  
24 measurements are not a reasonable representation of levels in the first pregnancy for all women; this may lead to  
25 residual confounding. However given that the associations we observe are null, we do not think this has biased our  
26 results.

27  
28  
29  
30  
31  
32  
33  
34  
35  
36  
37  
38  
39  
40  
41  
42  
43  
44  
45  
46  
47  
48  
49  
50  
51  
52  
53 In conclusion, our results do not support an association between inter-pregnancy intervalIPI and  
54 cardiovascular risk factors, though our findings must be interpreted in light of the large losses to follow-up and  
55 limitations in our measurement of IPI. Further studies in other populations with more detailed data on gestational age  
56  
57  
58  
59  
60

1  
2  
3  
4  
5  
6  
7  
8  
9  
10  
11  
12  
13  
14  
15  
16  
17  
18  
19  
20  
21  
22  
23  
24  
25  
26  
27  
28  
29  
30  
31  
32  
33  
34  
35  
36  
37  
38  
39  
40  
41  
42  
43  
44  
45  
46  
47  
48  
49  
50  
51  
52  
53  
54  
55  
56  
57  
58  
59  
60

at delivery of all pregnancies, in different settings such as low income countries where the social patterning of ~~inter-~~  
~~pregnancy interval~~<sup>IPI</sup> may differ and in older women with greater inter-individual variability in cardiovascular risk  
factors would provide a more comprehensive understanding of these associations.

For peer review only

## ACKNOWLEDGEMENTS

We are extremely grateful to all the families who took part in this study, the midwives for their help in recruiting them, and the whole ALSPAC team, which includes interviewers, computer and laboratory technicians, clerical workers, research scientists, volunteers, managers, receptionists and nurses. This publication is the work of the authors and DWK will serve as guarantor for the contents of this paper.

## COMPETING INTERESTS

None declared

## FUNDING

The work was supported by the British Heart Foundation [SP/07/008/24066], the UK Medical Research Council [0701594 to A.F and G1002375 to LH] and the Wellcome Trust (and WT099874MA to D.W.K ). AF, DAL and LDH work in a unit that receives funding from the UK Medical Research Council and the University of Bristol. The UK Medical Research Council ([074882], the Wellcome Trust [WT076467] and the University of Bristol provide core funding support for ALSPAC.

## AUTHOR CONTRIBUTIONS

DAL, LH and AF conceived the study idea; DWK, LH and AF developed the analysis plan; DWK undertook the analysis under the supervision of LH and AF; DWK wrote the first draft of the paper and collated co-author feedback; and all authors contributed to the critical review and final version.

## REFERENCES

- 1 N. Sattar, Do pregnancy complications and CVD share common antecedents? *Atheroscler Suppl* 2004;**5**:3-7
- 2 A. Wendt, C. M. Gibbs, S. Peters, et al., Impact of increasing inter-pregnancy interval on maternal and infant health. *Paediatric and perinatal epidemiology* 2012;**26 Suppl 1**:239-58
- 3 C. G. Solomon, F. B. Hu, A. Dunaif, et al., Menstrual cycle irregularity and risk for future cardiovascular disease. *The Journal of clinical endocrinology and metabolism* 2002;**87**:2013-7
- 4 N. I. Parikh, S. Cnattingius, M. A. Mittleman, et al., Subfertility and risk of later life maternal cardiovascular disease. *Human reproduction* 2012;**27**:568-75
- 5 A. Fraser, C. Macdonald-Wallis, K. Tilling, et al., Cohort Profile: The Avon Longitudinal Study of Parents and Children: ALSPAC mothers cohort. *Int J Epidemiol* 2012;**97**:110
- 6 F. Atsma, M. L. Bartelink, D. E. Grobbee, et al., Reproductive factors, metabolic factors, and coronary artery calcification in older women. *Menopause* 2008;**15**:899-904
- 7 J. M. Catov, A. B. Newman, K. Sutton-Tyrrell, et al., Parity and cardiovascular disease risk among older women: how do pregnancy complications mediate the association? *Ann Epidemiol* 2008;**18**:873-9
- 8 L. G. Gallagher, L. B. Davis, R. M. Ray, et al., Reproductive history and mortality from cardiovascular disease among women textile workers in Shanghai, China. *International Journal of Epidemiology* 2011;**40**:1510-1518
- 9 A. Green, V. Beral and K. Moser, Mortality in Women in Relation to Their Childbearing History. *Brit Med J* 1988;**297**:391-395
- 10 D. H. Jaffe, Z. Eisenbach and O. Manor, The effect of parity on cause-specific mortality among married men and women. *Matern Child Health J* 2011;**15**:376-85
- 11 R. B. Ness, T. Harris, J. Cobb, et al., Number of pregnancies and the subsequent risk of cardiovascular disease. *N Engl J Med* 1993;**328**:1528-33
- 12 N. I. Parikh, S. Cnattingius, P. W. Dickman, et al., Parity and risk of later-life maternal cardiovascular disease. *American heart journal* 2010;**159**:215-221 e6
- 13 P. Royston, Multiple imputation of missing values. *Stata J* 2004;**4**:227-241
- 14 H. S. Chang, N. Odongua, H. Ohrr, et al., Reproductive risk factors for cardiovascular disease mortality among postmenopausal women in Korea: the Kangwha Cohort Study, 1985-2005. *Menopause* 2011;**18**:1205-12
- 15 G. A. Colditz, W. C. Willett, M. J. Stampfer, et al., A prospective study of age at menarche, parity, age at first birth, and coronary heart disease in women. *Am J Epidemiol* 1987;**126**:861-70
- 16 K. Steenland, C. Lally and M. Thun, Parity and coronary heart disease among women in the American Cancer Society CPS II population. *Epidemiology* 1996;**7**:641-3
- 17 A. J. Sogaard, R. Selmer, E. Bjertness, et al., The Oslo Health Study: The impact of self-selection in a large, population-based survey. *International journal for equity in health* 2004;**3**:3
- 18 A. J. Van Loon, M. Tjhuis, H. S. Picavet, et al., Survey non-response in the Netherlands: effects on prevalence estimates and associations. *Ann Epidemiol* 2003;**13**:105-10
- 19 R. M. Nilsen, S. E. Vollset, H. K. Gjessing, et al., Self-selection and bias in a large prospective pregnancy cohort in Norway. *Paediatric and perinatal epidemiology* 2009;**23**:597-608
- 20 E. A. Nohr, M. Frydenberg, T. B. Henriksen, et al., Does low participation in cohort studies induce bias? *Epidemiology* 2006;**17**:413-8

## FIGURES LEGENDS

Figure 1 – Flow-chart of selection of women for analysis

For peer review only

1  
2  
3  
4  
5  
6  
7  
8  
9  
10  
11  
12  
13  
14  
15  
16  
17  
18  
19  
20  
21  
22  
23  
24  
25  
26  
27  
28  
29  
30  
31  
32  
33  
34  
35  
36  
37  
38  
39  
40  
41  
42  
43  
44  
45  
46  
47  
48  
49  
50  
51  
52  
53  
54  
55  
56  
57  
58  
59  
60

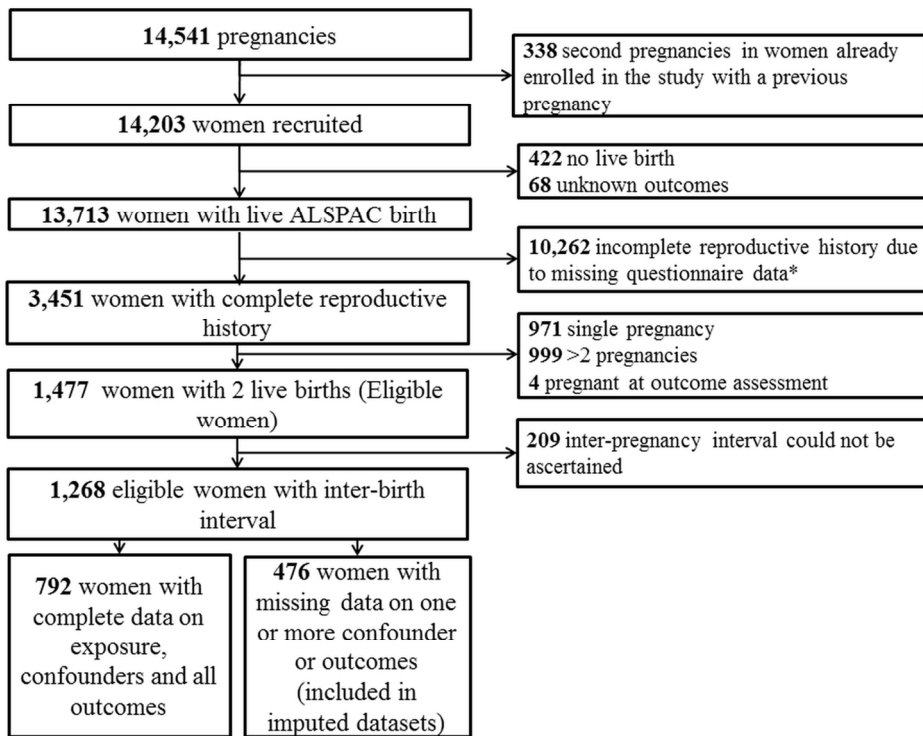

119x90mm (300 x 300 DPI)

ew only

**Web table 1** – Distributions of imputed characteristics (% or mean (standard error)) in the imputation datasets and in the complete case sample (i.e. non-imputed)

| Imputed Variables                   | Missing          |                | Imputed Data | Non-imputed  |     |
|-------------------------------------|------------------|----------------|--------------|--------------|-----|
|                                     | (n)              | % data imputed |              |              |     |
| <b>Exposure</b>                     |                  |                |              |              |     |
| Inter pregnancy interval            | 0                | 0%             | N/A          | 44.85 (0.84) |     |
| <b>Confounders</b>                  |                  |                |              |              |     |
| Pre-pregnancy BMI                   | 61               | 5%             | 22.6 (0.1)   | 22.6 (0.1)   |     |
| Height                              | 17               | 1%             | 164.7 (0.2)  | 164.7 (0.2)  |     |
| Single parent household             | 4                | 0.3%           | 2%           | 2%           |     |
| Education                           | < O-Level        |                | 13%          | 13%          |     |
|                                     | O-Level          |                | 34%          | 34%          |     |
|                                     | A-Level          | 3              | 0.2%         | 32%          | 32% |
|                                     | > A-Level        |                | 22%          | 22%          |     |
| Social Class                        | i                |                | 21%          | 21%          |     |
|                                     | ii               |                | 48%          | 48%          |     |
|                                     | iii (non-manual) | 25             | 2%           | 22%          | 22% |
|                                     | iii (manual)     |                |              | 7%           | 7%  |
|                                     | iv & v           |                |              | 2%           | 2%  |
| Ethnicity - White                   | 8                | 0.6%           | 99%          | 99%          |     |
| Ever Smoked                         | 2                | 0.2%           | 37%          | 37%          |     |
| Age                                 | 0                | 0%             | 27.9 (0.1)   | 27.9 (0.1)   |     |
| <b>Outcomes at follow-up clinic</b> |                  |                |              |              |     |
| Avg. Arterial Distensibility (mm)   | 323              | 26%            | 0.5 (0.004)  | 0.5 (0.004)  |     |
| Common Carotid Intima (mm)          | 323              | 26%            | 0.6 (0.002)  | 0.6 (0.002)  |     |
| Waist (cm)                          | 324              | 26%            | 83.1 (0.3)   | 82.9 (0.4)   |     |
| SBP (mm hg)                         | 343              | 27%            | 117.9 (0.4)  | 117.7 (0.4)  |     |
| Fat Mass (kg)                       | 327              | 26%            | 26.3 (293.9) | 26.1 (327.9) |     |
| BMI (kg/m <sup>2</sup> )            | 324              | 26%            | 26.1 (0.1)   | 25.9 (0.2)   |     |
| DBP (mm hg)                         | 343              | 27%            | 71.7 (0.3)   | 71.5 (0.3)   |     |
| Heart rate                          | 343              | 27%            | 83.7 (0.4)   | 83.8 (0.4)   |     |
| Cholesterol (mmol/l)                | 365              | 29%            | 4.9 (0.03)   | 4.9 (0.03)   |     |
| HDL (mmol/l)                        | 365              | 29%            | 1.5 (0.01)   | 1.5 (0.01)   |     |
| LDL (mmol/l)                        | 365              | 29%            | 3 (0.03)     | 3 (0.03)     |     |
| Non-HDL cholesterol (mmol/l)        | 365              | 29%            | 3.4 (0.03)   | 3.4 (0.03)   |     |
| Insulin (mu/l) (log)                | 370              | 29%            | 1.5 (0.02)   | 1.5 (0.02)   |     |
| Pro-Insulin (pu/l) (log)            | 367              | 29%            | 1.7 (0.02)   | 1.7 (0.02)   |     |
| Triglyceride (mmol/l) (log)         | 365              | 29%            | -0.1 (0.01)  | -0.1 (0.01)  |     |
| CRP(mg/l) (log)                     | 365              | 29%            | 0.1 (0.04)   | 0 (0.04)     |     |
| Glucose (mmol/l) (log)              | 365              | 29%            | 1.6 (0.004)  | 1.6 (0.004)  |     |



**Web table 2** – Comparison of inter-pregnancy interval between women included in the complete case analysis (n=792) versus women with missing data (n=476)

|                                      | All included women n=1268 |                        |         |
|--------------------------------------|---------------------------|------------------------|---------|
|                                      | Missing data<br>n=476     | Complete<br>Case n=792 | P-value |
| Inter-pregnancy interval<br>(months) |                           |                        |         |
| ≤15                                  | 100 (21.0)                | 171 (21.6)             | 0.37    |
| 16-27                                | 146 (31.7)                | 269 (34.0)             |         |
| >27                                  | 230 (48.3)                | 352 (44.4)             |         |

For peer review only

**Web table 3** – Characteristics of eligible women (with two live births) compared to women with one or three or more live/still births, with full reproductive history n=3447

|                                                   | No. of births    |                   |                   |                   |                           |                   | P-value    |        |
|---------------------------------------------------|------------------|-------------------|-------------------|-------------------|---------------------------|-------------------|------------|--------|
|                                                   | 1 birth (n=972)  |                   | 2 births (n=1479) |                   | 3 or more births (n=1000) |                   |            |        |
| <b>Confounder Variables</b>                       |                  |                   |                   |                   |                           |                   |            |        |
| Ethnicity - White n (%)                           | n=961            | 948 (98.7)        | n=1469            | 1449 (98.6)       | n=987                     | 973 (98.6)        | 1.0        |        |
| Social Class n (%)                                |                  |                   |                   |                   |                           |                   |            |        |
|                                                   | i                | 177 (18.9)        |                   | 297 (20.5)        |                           | 190 (20.0)        |            |        |
|                                                   | ii               | 471 (50.2)        |                   | 693 (47.9)        |                           | 437 (46.1)        |            |        |
|                                                   | iii (non-manual) | n=938             | 224 (23.9)        | n=1448            | 326 (22.5)                | n=949             | 188 (19.8) | <0.001 |
|                                                   | iii (manual)     |                   | 54 (5.8)          |                   | 100 (6.9)                 |                   | 104 (12.0) |        |
|                                                   | iv & v           |                   | 12 (1.3)          |                   | 32 (2.2)                  |                   | 30 (3.2)   |        |
| Education (University Level or above) n (%)       | n=962            | 212 (22.0)        | n=1475            | 313 (21.2)        | n=988                     | 217 (22.0)        | 0.9        |        |
| Single Parent Household n (%)                     | n=946            | 30 (3.2)          | n=1474            | 35 (2.4)          | n=983                     | 37 (3.8)          | 0.1        |        |
| Ever smoked n (%)                                 | n=969            | 380 (39.2)        | n=1476            | 557 (37.7)        | n=996                     | 432 (43.4)        | 0.02       |        |
| Age mean (SD)*                                    | n=972            | 29.3 (4.3)        | n=1479            | 29.9 (4.1)        | n=1000                    | 30.0 (4.8)        | 0.0004     |        |
| Pre-Preg BMI (kg/m <sup>2</sup> )* - median (IQR) | n=923            | 21.9 (20.4,24.1)  | n=1403            | 22.1 (20.4,24.1)  | n=931                     | 22.1 (20.5,24.1)  | 0.81       |        |
| <b>Outcome Variables - median (IQR)</b>           |                  |                   |                   |                   |                           |                   |            |        |
| BMI (kg/m <sup>2</sup> )*                         | n=730            | 25.2 (22.6,28.5)  | n=1095            | 25 (22.6,29.3)    | n=705                     | 25.9 (22.9,29.3)  | 0.003      |        |
| Waist (cm)*                                       | n=730            | 81.3 (74.7,89.3)  | n=1095            | 81 (74.8,92.3)    | n=705                     | 83.1 (75.7,92.3)  | 0.0003     |        |
| SBP (mm hg)*                                      | n=714            | 116.8 (109.8,126) | n=1071            | 115.3 (109,125.5) | n=691                     | 117 (110.3,125.5) | 0.2        |        |
| DBP (mm hg)*                                      | n=714            | 71 (66,76.8)      | n=1071            | 70.3 (65.5,76.3)  | n=691                     | 71.3 (66.3,76.3)  | 1.0        |        |
| Pulse*                                            | n=714            | 82.5 (76,89.5)    | n=1071            | 83 (76.8,91.5)    | n=691                     | 83.8 (77,91.5)    | 0.01       |        |
| Fat Mass (kg)*                                    | n=724            | 25.3 (19.1,32)    | n=1091            | 24.2 (18.9,34.2)  | n=704                     | 25.9 (18.9,34.2)  | 0.01       |        |
| Avg. Arterial Distensibility (mm)*                | n=716            | 0.5 (0.4,0.6)     | n=1069            | 0.5 (0.4,0.6)     | n=691                     | 0.5 (0.4,0.6)     | 0.5        |        |
| Common Carotid Intima (mm)*                       | n=719            | 0.6 (0.5,0.6)     | n=1069            | 0.6 (0.5,0.6)     | n=691                     | 0.6 (0.5,0.6)     | 1.0        |        |
| Cholesterol (mmol/l)*                             | n=692            | 4.8 (4.3,5.4)     | n=1043            | 4.9 (4.3,5.5)     | n=676                     | 4.9 (4.4,5.5)     | 0.2        |        |
| High-density Lipoprotein (mmol/l)*                | n=692            | 1.5 (1.2,1.7)     | n=1043            | 1.5 (1.2,1.7)     | n=676                     | 1.4 (1.2,1.7)     | 0.1        |        |
| Non-HDL cholesterol (mmol/l)*                     | n=692            | 3.3 (2.7,4)       | n=1043            | 3.4 (2.8,4)       | n=676                     | 3.5 (2.9,4)       | 0.1        |        |
| Very-low density lipoprotein (mmol/l)*            | n=692            | 0.4 (0.3,0.5)     | n=1043            | 0.4 (0.3,0.6)     | n=676                     | 0.4 (0.3,0.6)     | 0.03       |        |
| Insulin (mu/l)**                                  | n=692            | 4.7 (3.3,6.3)     | n=1038            | 4.5 (3.2,6.8)     | n=674                     | 4.7 (3.2,6.8)     | 0.2        |        |
| Pro-insulin (pu/l)**                              | n=692            | 5 (3.7,7.2)       | n=1041            | 5 (3.6,8)         | n=675                     | 5.3 (3.7,8)       | 0.2        |        |
| Triglyceride (mmol/l)**                           | n=692            | 0.9 (0.7,1.2)     | n=1043            | 0.9 (0.7,1.2)     | n=676                     | 0.9 (0.7,1.2)     | 0.1        |        |
| CRP (mg/l)**                                      | n=692            | 0.9 (0.5,2)       | n=1043            | 0.9 (0.4,2.2)     | n=676                     | 1 (0.5,2.2)       | 0.5        |        |
| Glucose (mmol/l)**                                | n=692            | 5.2 (4.9,5.5)     | n=1043            | 5.1 (4.9,5.5)     | n=676                     | 5.2 (4.9,5.5)     | 0.3        |        |

\* linear regression for p-value

\*\* log transformed for linear regression

**Web table 4** - Confounder and mediator adjusted analysis of the association between inter-pregnancy interval and cardiovascular risk factors using multivariate multiply imputed data (N=1268)

|                                   | Inter-pregnancy interval <sup>a</sup> |              |           |                    |         |
|-----------------------------------|---------------------------------------|--------------|-----------|--------------------|---------|
|                                   | ≤15 months                            | 16-27 months |           | >27 months         |         |
|                                   | β* (95% CI)                           | P-value      | Ref Group | β* (95% CI)        | P-value |
| Avg. Arterial Distensibility (mm) | -0.001 (-0.02,0.02)                   | 0.9          | 0         | 0.01 (-0.004,0.03) | 0.1     |
| Common Carotid Intima (mm)        | 0.004 (-0.01,0.02)                    | 0.5          | 0         | 0.002 (-0.01,0.01) | 0.7     |
| Waist (cm)                        | -0.1 (-1,0.7)                         | 0.8          | 0         | 0.1 (-0.7,0.9)     | 0.8     |
| Systolic BP (mm hg)               | 0.3 (-1.8,2.3)                        | 0.8          | 0         | -0.4 (-2.2,1.3)    | 0.6     |
| Diastolic BP (mm hg)              | 0.2 (-1.1,1.6)                        | 0.8          | 0         | -0.5 (-1.6,0.6)    | 0.4     |
| Heart Rate                        | 0.4 (-1.5,2.3)                        | 0.7          | 0         | -0.1 (-1.8,1.7)    | 1.0     |
| Cholesterol (mmol/l)              | -0.1 (-0.3,0.04)                      | 0.1          | 0         | -0.1 (-0.2,0.1)    | 0.4     |
| HDL (mmol/l)                      | 0.02 (-0.05,0.1)                      | 0.6          | 0         | 0.02 (-0.04,0.1)   | 0.6     |
|                                   | % Change (95% CI)                     | P-value      | Ref Group | % Change (95% CI)  | P-value |
| Insulin (mu/l)**                  | 1 (0.9,1.1)                           | 1.0          | 0         | 1 (0.9,1.1)        | 0.6     |
| Pro-Insulin (pmol/l)**            | 1 (1,1.1)                             | 0.4          | 0         | 1.1 (1,1.1)        | 0.2     |
| Triglyceride (mmol/l)**           | 0.9 (0.9,1)                           | 0.1          | 0         | 0.9 (0.9,1)        | 0.02    |
| CRP (mg/l)**                      | 0.9 (0.8,1.1)                         | 0.6          | 0         | 1 (0.9,1.2)        | 0.7     |
| Glucose (mmol/l)**                | 1 (1,1)                               | 0.6          | 0         | 1 (1,1)            | 0.3     |

\* Mean difference compared with 16-27 months

\*\* Log transformed

<sup>a</sup> Adjusted for age, ethnicity, social class, education, pre-pregnancy BMI, ever smoking during pregnancy and BMI at follow-up clinic

**Web table 5** – Unadjusted, confounder and mediator adjusted analysis of the association between inter-pregnancy interval and blood based cardiovascular risk factors using complete case data (N=792)

|                         | Analysis Model Number | Inter-pregnancy interval |           |              |                   |         |
|-------------------------|-----------------------|--------------------------|-----------|--------------|-------------------|---------|
|                         |                       | ≤15 months               | P-value   | 16-27 months | >27 months        | P-value |
|                         |                       | β* (95% CI)              | Ref Group | β* (95% CI)  | P-value           |         |
| Cholesterol (mmol/l)    | Model 1 <sup>a</sup>  | -0.2(-0.3,-0.004)        | 0.04      | 0            | -0.2(-0.3,-0.01)  | 0.03    |
|                         | Model 2 <sup>b</sup>  | -0.2(-0.3,-0.02)         | 0.03      | 0            | -0.1(-0.2,0.1)    | 0.3     |
|                         | Model 3 <sup>c</sup>  | -0.2(-0.4,-0.03)         | 0.02      | 0            | -0.1(-0.2,0.1)    | 0.3     |
| HDL (mmol/l)            | Model 1 <sup>a</sup>  | 0.02(-0.1,0.1)           | 0.6       | 0            | 0(-0.1,0.1)       | 0.9     |
|                         | Model 2 <sup>b</sup>  | 0.02(-0.1,0.1)           | 0.7       | 0            | 0.02(-0.04,0.1)   | 0.4     |
|                         | Model 3 <sup>c</sup>  | 0.02(-0.04,0.1)          | 0.5       | 0            | 0.03(-0.03,0.1)   | 0.4     |
|                         |                       | % Change (95% CI)        | P-value   | Ref Group    | % Change (95% CI) | P-value |
| Insulin (mu/l)**        | Model 1 <sup>a</sup>  | 1(0.9,1.2)               | 0.6       | 0            | 1.1(1,1.2)        | 0.2     |
|                         | Model 2 <sup>b</sup>  | 1(0.9,1.2)               | 0.6       | 0            | 1(0.9,1.2)        | 0.4     |
|                         | Model 3 <sup>c</sup>  | 1(0.9,1.1)               | 0.9       | 0            | 1(0.9,1.1)        | 0.4     |
| Pro-Insulin (pmol/l)**  | Model 1 <sup>a</sup>  | 1(0.9,1.2)               | 0.4       | 0            | 1.1(1,1.2)        | 0.1     |
|                         | Model 2 <sup>b</sup>  | 1(0.9,1.1)               | 0.4       | 0            | 1.1(1,1.2)        | 0.1     |
|                         | Model 3 <sup>c</sup>  | 1(0.9,1.1)               | 0.6       | 0            | 1.1(1,1.1)        | 0.1     |
| Triglyceride (mmol/l)** | Model 1 <sup>a</sup>  | 0.9(0.9,1)               | 0.1       | 0            | 0.9(0.8,1)        | 0.003   |
|                         | Model 2 <sup>b</sup>  | 0.9(0.9,1)               | 0.1       | 0            | 0.9(0.8,1)        | 0.003   |
|                         | Model 3 <sup>c</sup>  | 0.9(0.8,1)               | 0.02      | 0            | 0.9(0.8,1)        | 0.001   |
| CRP (mg/l)**            | Model 1 <sup>a</sup>  | 1(0.8,1.2)               | 0.6       | 0            | 1(0.8,1.2)        | 0.9     |
|                         | Model 2 <sup>b</sup>  | 1(0.8,1.2)               | 0.7       | 0            | 1(0.8,1.2)        | 0.8     |
|                         | Model 3 <sup>c</sup>  | 0.9(0.8,1.1)             | 0.4       | 0            | 1(0.8,1.1)        | 0.7     |
| Glucose (mmol/l)**      | Model 1 <sup>a</sup>  | 1(1,1)                   | 0.6       | 0            | 1(1,1)            | 0.5     |
|                         | Model 2 <sup>b</sup>  | 1(1,1)                   | 0.5       | 0            | 1(1,1)            | 0.4     |
|                         | Model 3 <sup>c</sup>  | 1(1,1)                   | 0.4       | 0            | 1(1,1)            | 0.4     |

\* Mean difference compared with 16-27 months

\*\* Log transformed

<sup>a</sup> Unadjusted model<sup>b</sup> Adjusted for age, ethnicity, social class, education, pre-pregnancy BMI, ever smoking during pregnancy<sup>c</sup> Adjusted for age, ethnicity, social class, education, pre-pregnancy BMI, ever smoking during pregnancy and BMI at follow-up clinic

**Web table 6** - Unadjusted, confounder and mediator analysis of the association between inter-pregnancy interval and non-blood based cardiovascular risk factors using complete case data (N=792)

|                                       | Analysis Model Number | Inter-pregnancy interval |         |              |                    |         |
|---------------------------------------|-----------------------|--------------------------|---------|--------------|--------------------|---------|
|                                       |                       | ≤15 months               |         | 16-27 months | >27 months         |         |
|                                       |                       | β* (95% CI)              | P-value | Ref Group    | β* (95% CI)        | P-value |
| Avg. Arterial Distensibility (mm)     | Model 1 <sup>a</sup>  | -0.005(-0.03,0.02)       | 0.7     | 0            | 0.02(0.001,0.04)   | 0.04    |
|                                       | Model 2 <sup>b</sup>  | -0.003(-0.02,0.02)       | 0.8     | 0            | 0.01(-0.01,0.03)   | 0.2     |
|                                       | Model 3 <sup>c</sup>  | -0.002(-0.02,0.02)       | 0.9     | 0            | 0.01(-0.01,0.03)   | 0.2     |
| Common Carotid Intima (mm)            | Model 1 <sup>a</sup>  | 0.01(-0.005,0.02)        | 0.2     | 0            | -0.002(-0.01,0.01) | 0.8     |
|                                       | Model 2 <sup>b</sup>  | 0.01(-0.01,0.02)         | 0.3     | 0            | 0.003(-0.01,0.01)  | 0.6     |
|                                       | Model 3 <sup>c</sup>  | 0.01(-0.01,0.02)         | 0.4     | 0            | 0.003(-0.01,0.01)  | 0.6     |
| Total body fat mass (kg) <sup>d</sup> | Model 1 <sup>a</sup>  | 0.2(-1.7,2.1)            | 0.8     | 0            | 0.3(-1.2,1.9)      | 0.7     |
|                                       | Model 2 <sup>b</sup>  | 0.1(-1.3,1.4)            | 0.9     | 0            | 0(-1.1,1.2)        | 1.0     |
| BMI (kg/m <sup>2</sup> )              | Model 1 <sup>a</sup>  | 0.3(-0.6,1.2)            | 0.5     | 0            | 0.3(-0.5,1)        | 0.5     |
|                                       | Model 2 <sup>b</sup>  | 0.3(-0.3,0.8)            | 0.3     | 0            | 0.1(-0.4,0.6)      | 0.7     |
| Waist (cm)                            | Model 1 <sup>a</sup>  | 0.6(-1.5,2.7)            | 0.6     | 0            | 0.8(-1,2.5)        | 0.4     |
|                                       | Model 2 <sup>b</sup>  | 0.5(-1.1,2.1)            | 0.5     | 0            | 0.5(-0.8,1.8)      | 0.5     |
|                                       | Model 3 <sup>c</sup>  | -0.1(-1.1,0.9)           | 0.8     | 0            | 0.3(-0.6,1.1)      | 0.5     |
| Systolic BP (mm hg)                   | Model 1 <sup>a</sup>  | 0.8(-1.6,3.2)            | 0.5     | 0            | -0.6(-2.6,1.4)     | 0.6     |
|                                       | Model 2 <sup>b</sup>  | 0.6(-1.7,3)              | 0.6     | 0            | -0.7(-2.7,1.3)     | 0.5     |
|                                       | Model 3 <sup>c</sup>  | 0.3(-1.9,2.6)            | 0.8     | 0            | -0.8(-2.7,1.1)     | 0.4     |
| Diastolic BP (mm hg)                  | Model 1 <sup>a</sup>  | 0.3(-1.3,1.9)            | 0.7     | 0            | -0.5(-1.9,0.8)     | 0.4     |
|                                       | Model 2 <sup>b</sup>  | 0.3(-1.3,1.8)            | 0.7     | 0            | -0.7(-2,0.7)       | 0.3     |
|                                       | Model 3 <sup>c</sup>  | 0.1(-1.5,1.6)            | 0.9     | 0            | -0.7(-2,0.6)       | 0.3     |
| Heart Rate                            | Model 1 <sup>a</sup>  | 0.2(-1.9,2.3)            | 0.8     | 0            | -0.3(-2,1.5)       | 0.7     |
|                                       | Model 2 <sup>b</sup>  | 0.1(-2,2.2)              | 0.9     | 0            | -0.3(-2.1,1.5)     | 0.7     |
|                                       | Model 3 <sup>c</sup>  | -0.1(-2.1,2)             | 1.0     | 0            | -0.4(-2.1,1.4)     | 0.7     |

\* Mean difference compared with 16-27 months

<sup>a</sup> Unadjusted model

<sup>b</sup> Adjusted for 1 age, 1 ethnicity, social class, education, pre-pregnancy BMI, ever smoking during pregnancy

<sup>c</sup> Adjusted for age, ethnicity, social class, education, pre-pregnancy BMI, ever smoking during pregnancy and BMI at follow-up clinic

<sup>d</sup> Height and height2 were included into the model

STROBE 2007 (v4) Statement—Checklist of items that should be included in reports of *cohort studies*

| Section/Topic                | Item # | Recommendation                                                                                                                                                                       | Reported on page # |
|------------------------------|--------|--------------------------------------------------------------------------------------------------------------------------------------------------------------------------------------|--------------------|
| Title and abstract           | 1      | (a) Indicate the study's design with a commonly used term in the title or the abstract                                                                                               | 1                  |
|                              |        | (b) Provide in the abstract an informative and balanced summary of what was done and what was found                                                                                  | 3                  |
| <b>Introduction</b>          |        |                                                                                                                                                                                      |                    |
| Background/rationale         | 2      | Explain the scientific background and rationale for the investigation being reported                                                                                                 | 5                  |
| Objectives                   | 3      | State specific objectives, including any prespecified hypotheses                                                                                                                     | 5                  |
| <b>Methods</b>               |        |                                                                                                                                                                                      |                    |
| Study design                 | 4      | Present key elements of study design early in the paper                                                                                                                              | 6                  |
| Setting                      | 5      | Describe the setting, locations, and relevant dates, including periods of recruitment, exposure, follow-up, and data collection                                                      | 6-8                |
| Participants                 | 6      | (a) Give the eligibility criteria, and the sources and methods of selection of participants. Describe methods of follow-up                                                           | 6-8 & figure 1     |
|                              |        | (b) For matched studies, give matching criteria and number of exposed and unexposed                                                                                                  | n/a                |
| Variables                    | 7      | Clearly define all outcomes, exposures, predictors, potential confounders, and effect modifiers. Give diagnostic criteria, if applicable                                             | 6-8                |
| Data sources/<br>measurement | 8*     | For each variable of interest, give sources of data and details of methods of assessment (measurement). Describe comparability of assessment methods if there is more than one group | 6-8                |
| Bias                         | 9      | Describe any efforts to address potential sources of bias                                                                                                                            | 17-18 & web tables |
| Study size                   | 10     | Explain how the study size was arrived at                                                                                                                                            | 6-9 & figure 1     |
| Quantitative variables       | 11     | Explain how quantitative variables were handled in the analyses. If applicable, describe which groupings were chosen and why                                                         | 8                  |
| Statistical methods          | 12     | (a) Describe all statistical methods, including those used to control for confounding                                                                                                | 8-9                |
|                              |        | (b) Describe any methods used to examine subgroups and interactions                                                                                                                  | 8-9                |
|                              |        | (c) Explain how missing data were addressed                                                                                                                                          | 8-9                |
|                              |        | (d) If applicable, explain how loss to follow-up was addressed                                                                                                                       | 17                 |
|                              |        | (e) Describe any sensitivity analyses                                                                                                                                                | 8-9                |
| <b>Results</b>               |        |                                                                                                                                                                                      |                    |

|                          |     |                                                                                                                                                                                                              |                 |
|--------------------------|-----|--------------------------------------------------------------------------------------------------------------------------------------------------------------------------------------------------------------|-----------------|
| Participants             | 13* | (a) Report numbers of individuals at each stage of study—eg numbers potentially eligible, examined for eligibility, confirmed eligible, included in the study, completing follow-up, and analysed            | 9 & Figure 1    |
|                          |     | (b) Give reasons for non-participation at each stage                                                                                                                                                         | 9 & Figure 1    |
|                          |     | (c) Consider use of a flow diagram                                                                                                                                                                           | Figure 1        |
| Descriptive data         | 14* | (a) Give characteristics of study participants (eg demographic, clinical, social) and information on exposures and potential confounders                                                                     | 10 & 12         |
|                          |     | (b) Indicate number of participants with missing data for each variable of interest                                                                                                                          | Web table       |
|                          |     | (c) Summarise follow-up time (eg, average and total amount)                                                                                                                                                  | 13              |
| Outcome data             | 15* | Report numbers of outcome events or summary measures over time                                                                                                                                               | 13              |
| Main results             | 16  | (a) Give unadjusted estimates and, if applicable, confounder-adjusted estimates and their precision (eg, 95% confidence interval). Make clear which confounders were adjusted for and why they were included |                 |
|                          |     | (b) Report category boundaries when continuous variables were categorized                                                                                                                                    | 15 & 16         |
|                          |     | (c) If relevant, consider translating estimates of relative risk into absolute risk for a meaningful time period                                                                                             |                 |
| Other analyses           | 17  | Report other analyses done—eg analyses of subgroups and interactions, and sensitivity analyses                                                                                                               | 14 & web tables |
| <b>Discussion</b>        |     |                                                                                                                                                                                                              |                 |
| Key results              | 18  | Summarise key results with reference to study objectives                                                                                                                                                     | 17              |
| <b>Limitations</b>       |     |                                                                                                                                                                                                              |                 |
| Interpretation           | 20  | Give a cautious overall interpretation of results considering objectives, limitations, multiplicity of analyses, results from similar studies, and other relevant evidence                                   | 17-18           |
| Generalisability         | 21  | Discuss the generalisability (external validity) of the study results                                                                                                                                        | 17-18           |
| <b>Other information</b> |     |                                                                                                                                                                                                              |                 |
| Funding                  | 22  | Give the source of funding and the role of the funders for the present study and, if applicable, for the original study on which the present article is based                                                | 19              |

\*Give information separately for cases and controls in case-control studies and, if applicable, for exposed and unexposed groups in cohort and cross-sectional studies.

**Note:** An Explanation and Elaboration article discusses each checklist item and gives methodological background and published examples of transparent reporting. The STROBE checklist is best used in conjunction with this article (freely available on the Web sites of PLoS Medicine at <http://www.plosmedicine.org/>, Annals of Internal Medicine at <http://www.annals.org/>, and Epidemiology at <http://www.epidem.com/>). Information on the STROBE Initiative is available at [www.strobe-statement.org](http://www.strobe-statement.org).
